# Supplementary material for: Neuronal cell fate specification by the molecular convergence of different spatio-temporal cues on a common initiator terminal selector gene
Source: PubMed Central journal article supplement (PMC5411104; doi:10.1371/journal.pgen.1006729), 2017-04-17
Supplement: pgen.1006729.s008.pdf [file pgen.1006729.s008.pdf]

## SUPPLEMENTAL DATA 2

### CRISPR/Cas9 enhancer deletions

#### CRISPR/Cas9 protospacer primer design

Protospacer and PCR primer sequences used to build tandem gRNA constructs. DNA sequencing files of the CRM mutants used in this study.

Light blue = sequence complementary to the fly genome

primer 1: col\_dap-CRM

5' **tatataggaaagatatccgggtgaactc** **ggaattggttttcgtagcc** **gttttagagctagaaatagcaag** 3'

primer 2: col\_dap-CRM

5' **attttaacttgctatttctagctctaaaac** **catagggcagtgcatctggc** **gacgttaaattgaaaataggtc** 3'

primer 1: col\_tv-CRM

5' **tatataggaaagatatccgggtgaactc** **ggattattttctagtagg** **gttttagagctagaaatagcaag** 3'

primer 2: col\_tv-CRM

5' **attttaacttgctatttctagctctaaaac** **atggtgacttaggggattac** **gacgttaaattgaaaataggtc** 3'

primer 1: apS-CRM

5' **tatataggaaagatatccgggtgaactc** **ggtagacagccggaaggaga** **gttttagagctagaaatagcaag** 3'

primer 2: apS-CRM

5' **attttaacttgctatttctagctctaaaac** **tttacattaacttgctc** **gacgttaaattgaaaataggtc** 3'

primer 1: eya-CRM

5' **tatataggaaagatatccgggtgaactc** **gacgacgccgccgacacgg** **gttttagagctagaaatagcaag** 3'

primer 2: eya-CRM

5' **attttaacttgctatttctagctctaaaac** **aaacgaagtttcattgaacgacgttaaattgaaaataggtc** 3'

primer 1: dimm-CRM

5' **tatataggaaagatatccgggtgaactc** **gttggtgtaaaattgagtc** **gttttagagctagaaatagcaag** 3'

primer 2: dimm-CRM

5' **attttaacttgctatttctagctctaaaac** **aacctaaatcttggaggc** **gacgttaaattgaaaataggtc** 3'

primer 1: Nplp1-CRM

5' **tatataggaaagatatccgggtgaactc** **gtatataaagtcgagggtcc** **gttttagagctagaaatagcaag** 3'

primer 2: Nplp1-CRM

5' **attttaacttgctatttctagctctaaaac** **acagtaccgctggetccaac** **gacgttaaattgaaaataggtc** 3'

#### Sequenced CRM deletions

##### col-dAp-CRM mutant 2.5

Green: primers to amplify the enhancer region and the deleted fragment.

Light blue: gRNA location

Red: deleted sequence

**catttcgtgctctcattcgtgacca**

agcaggtgagttcaaaaatatttcaattagttat**ggatgaactca**acataaattataagaaatggtgctataact

agcaacggaacatacat**gtttagaaa**attagaaaatcataaataatatacattaataaactcaagttttaac

cttacacaactgaaagaagtaatgcccaaacatctaattgaatagggtgagtaatttctgcacagaaaact  
cgaaacaactcaaaaccacttaaatatattcgaaaattagcaattcatcttgcgattgccacttacataaatt  
aagaacttctgattgccacgctgcttcaactgcaattaaggccaaagttaa**ccaggctac**gaaaaccaattcc  
tttcaacttgctgcttccgtgcattttcccttttcccgacacgatgtttgtttgctgattcgagcataagtt  
gcatcgaattgattgcatggctaattaagtgtgctcctgggtgctccttggccaataaattgagtcgcaaaa  
cgagcagctcgttcggccaggactttccgactttcccgctgaaaaaaaagggtgtgaccggggtaacgaga  
gaagcgaacaaatcagagaatcgcacggggatcgaacattgtaatgcgcttgggtggtgctgaggtcc  
tggggcattatactggtccttatagctcgtgcacatatgtccgcttggcctaataatgcctgcgagtc  
ttttctgctctccttttcggcctttcaagggaataattctcagtgacaaattttatagacattgg  
acgactccttcgctccttccccattaaccccc**ccccct**ctctctctc**actcca**atcgggtggcactact  
ttctcgatttctctcgttttggggcgttcttgccttagccggttcgcatcagaaaacgagagcgcaat  
aaattgtccacaaattatcagacgatgcgacatcgccttcttttactttatggtgacaaatccattt  
gtcgaatgcaattaatcgaataattttgagcagccaccaattgaattgct**aaaaatatcacacg**aaaa  
**aaaaatggccgtaaaagaaaaggctctgtgaagttttgtaatttttttaggcttggcgataagaagat**  
**tatttatggcattgttttagcaatfaagcttgcacaaatgaatagcgcatagagagtactttaatat**  
**agcaaatgagtaattacaagcagtttaaggcttcaaggaaacatacgaattcccgtaaatgcgacagat**  
**tcccaatggatactcattgtacaactcactcaagttcaatttcacaataatcgaatacgaatcgggaagtaa**  
**aacatacatataagatggatgtataatttctaagaataactattacatcccggttagtcttctccgattt**  
**ccctaaatggccatttcgcttgaactgtggcgatattttgatagacctaccctaaacctgggaaaatcacac**  
**agctctgcgagtttgccttgaaggtgcgcaagctgggaaaagaacaatcattgatcggattaggtg**  
**ggttcggctcctttagacccttggcttgcactggatgtttgaattttacatttcgcttgcgctgt**  
**cgttttctttagcattgcgtaacaggttaaggcgggataagcagtggtatcttagcaagtgggattgca**  
**ctcgaactcgaactgggaactgtggcgggccaatgcgattaaggcgggaattgtctcaatcgaatggcagg**  
**aaggcaggacaattgcaactgccatccacgtggcaggaccaagaaaaaaaatgaaatccaaaaacaagc**  
**agcgacgaggcacaaccttgaaccttcttccggcgaatgcagcagcaaatcatggtcataatcataat**  
**tacattc gatcagataacggccaaaaacagttcgaacgggagcgtcgaattgcaattgagctaacgatggca**  
**ccacggaaaatgcctcatttcggcgatcatatttcatcagcggatggtggatagatagactggtgcta**  
**taagggtccggcataaaacaatagccaaatcctttgcccggttttgttttgccaaaattgcgcttatcgcg**  
**attaaaacgcacgcacaaaaagcgcacgaaattctaaacaaaaagagatggatagcgttcgagggcgagaggg**  
**agagacggcagataactggcgattaatgactgagataactgagttatagtggtgaaaggagcccaaaatcca**  
**ggcgaactactaatgacaaagatccgtcaaccggttaccgatttatccaaccgtaacggttaaacgaaa**  
**atcggaaagcagcattaaatccctatagccattgactcgcacacacacacacacactcgcacacat**  
**gctgttgcgcgctgtaattaagcgataaaatattttagtcaacacttaaacgccaaaagagagaga**  
**atcatttcgattattaacaaattgtacgacagctcgttaattggcaaatggtattgttgcgctggc**  
**gccgccggcactcaataattcaacagattgcgcgaaatctccacattgcatgtgcgccctcctcgcctc**  
**ccgctcgcaccagcccattatggccctccccacgctggctccttccgacgcaatgcgataaaaatgct**  
**tttattcacggcaagtgcatttctgcggtcgaagagatggcgtaagagcagagagtgagtgagaaaacagg**  
**cggaaaaatgatcgtcctcattatgcgaaatgtgtaatgcatggcgtgctcccttgaaattctttggc**  
**tcccttgggggaactcggtttataaagggtg**cccaaatgcactgcctatgtgggt**gaaagcaatcttaact**  
taaataaatgagcaactgtaggttacatacttctgatgcttacaattgaaatatttaatacaataatatta  
catttcaaaaaaaaaaaaaaaaaacatagattggtttattgaaaggtcacaatgctctttagaattttatcata  
attagaacaatcaataattataactgccaaaaaagggtatacacagctctgtatttcataaagtgcatttcc  
aatacgttgcctatgtaattttcaacaagctg**gcattacattgtaacccgtgctcc**

### col-Tv-CRM mutant stock 7.2

Green: primers to amplify the enhancer region and the deleted fragment.

Light blue: gRNA location

Red: deleted sequence

**cacgcactacttaagccaatcta**ccaccttaattccgttttttcttttgaacacatgaaaa

attcaattccttagatttatattaatctaattgaaatccacaaatttgtgccatttgttgcagaagtatttt  
tgaatttcgcacacgttcgttggcaaaaatgtaacaaatattgaatacgaaaaagtcaaggaaaaattccattc  
ttttctcgcaaaaatggtgacagagcaaaatgctgaccgcccactagggaaaaataatcccagccgattg  
aacgatttattttggcccaactcggagcctgtcccggaaatcccggaaaccattaatcatccgagtcag  
atccaagtccgagtcgagtggtggacagggcgcattgcaattggtggacattttggagtggaagaaactttgc  
ggtacgtggcaactgttgaattacaaaatgtgttaaaaaatgaaaagcagggcgggtaaaaagcaaaataat  
atatttcattcacacagacttttctctgctccgccgtccatataaaaaacataaatttctttgagaatag  
aacttctgggatggagaggggggggggggggtgcaagggtgattatgtttgacagccgacttgggacacgaagcac  
cgcccccttttcatcgcaaacaggacatgggtattagatcctggccaaagtgcaaaactggcctcactttcc  
gtctgatttacggccaactattttgttaattttaccacttcctgctatcgacactcaactaaacatata  
aaaccaactattaaagagcaataaagtcaatttgattttcttggccttcgtaataatttctctgcatctc  
tctggggatcagcgaaaaatgaattattgaaacagctgaaggaaataataacaaaatcgggaaggccaatc  
tgtttaattttcagatatgttgggtggtgggtgaccaaatagacaatgctttttagcttcaacctccctcaagc  
gaaattgattttcatggttttctgttttctgcctaaaaatacaciaaagagtcgaaaaatttgactgtgatt  
gtcacttgaatgtgtgggtgggaaaaaccactccaaatccacttcaccaaataatgtagtatggaatcacgaacc  
tcgcttgatttccagtgatttttgcgaatcagcctgatgaggatgtccgagaacgttgctcatggaggcagt  
gctatgattagatcctttcagccaggtcaaaagtacgctgccgatgccaagtggcctcggccaaatgaaact  
ttaatgcgaaacaaggcaaaaaggctgaaagaaggctgctgatgaactacgtgatggtcagacaaattgaggt  
aactggaaaaataatagctaatctctagtttcttaggttaagggattaagtaagaatgtgtttaaaggactc  
ttttatagtaactgttactctaaagaaaacttatccacagaatagatgtgctattttatcgcagtgatgtgg  
atagtcaacgacaaaagtgaatgcattgaggttgggtggcgaacaaacgcgacctgaatcgcgaaattggaatagcc  
agcctactccgccccctcaggatataatagctacttcgactagcatatgcccagatagatagctggcgtatcaa  
tttcgataatgacttggaccgcgagtatctttattatcctgactgctgtgcaattatttccgactgctttactg  
tcgtaccgctttccgagtcctgggaaacgcaacaaaggatatttcgcgcacacgctcggacatgattgcatc  
cgggcaggaagcattgcgtcgtgctttttgcatcttaccatcgtcgttcttctcctgccgatcagaaccctg  
gctgcttttcatccgcaattttcacgcccactttgttgatgatgacaaatctcgttgcgtgttatcagattggc  
caactttccgttgctattccccctcgtattgcataatattgtttatctttggaagctgcgctcctgccacgtgc  
cttgcgttttggttagcttctgcgattttgctcggaaacgagtgccacgtgctaactggcggtcgtctgcaccgc  
ccatgcaaccagccacccccctgtaagtgaaccccgcctaacaatgtccgataattgaaatcgtaaagctgaa  
caacggaatcgaatggcttcattaatcaggtcacttcgatggcagcgcataatgttctcaaaaattgaaattg  
ggggcgggtgaaaagaggaaattggtctatagcacttagcgcgattgaattgtcattttgtgttaccta  
tggggaaaagatgtttcggttatcatgagtgatacttactattgtattcaaaaatggtgcatatatacaga  
agatataatattataatagatcttaaggagcattgtatccattcacaaaataggtaaaaataaagcttaaat  
taaattgtcatttaccttaaggacatcctttgcttaatgagtgactcatgcccacaccactcgaaccga  
atgagtgctgccctgcggacgcataaattataaataaaagcctcacacacgtggagaaaagaggtgatataac  
cttagagagagagagagaggagagctacagctcagggccaagaagtgtgctaaatatttaagtaactaaacca  
taaacctgagtatattataaattggctttaaacaagctcgtatgtgacgggtgggtgtgtctgtgggctgac  
cctttttcgggcacaaggatctgctcactcattcatttagaaatgtcactaatgtgccgactta  
aataatcaaatattatgcatggttatgtccttttagagcaggaccacaaaactgaagtctcagtgattgcgaa  
tgggattggctgtaagttaacggagaaacctttgagaatgagacgaagataatgtcaatatcctgttttcc  
aaaatgtctgacaaaagtgcagatgtccagatcgaacacgcccaagaccggtaccgttattctgctaccagt  
tttctgtttgtttgtttgtagccagcttgttggccgacactgagaccaaaaaggccaaaaaggcgc  
ccctcgggatttcttagtctgctgccagcttctcctccacattcttttgggggtccgatgagatttga  
attcacaaaaattaataggaatgtcggcatccatgttgtgataggctagtcttttctagcctagcaacatt  
ttgatgtgactaaagagaatcatctttatggccacaccggaaactcattctcaacaacaagcgacaataaa  
aacaatcaaatgcaacaatggcagcggcagcaaaaactttgagacattttcccacacacacacagacac  
acacatactcagtaaatgaacatttcagggacctagatatttattattacaggggtgactgcaggagcat  
taacccttactgccacggcagctcagcaacgggagactgaaaaaattgaaataaattacaaaactaaagg  
caacaactgttcgataatgaagtcaaatatattgtcctaagtgcactgagagaaatttaataacatg  
atttacacgatcatttctgatctttgcaacattttttagtgaaactaggaaaccctttacaagcgagatctt

cagttctttagtttctaagcattattctagatTTTTAAATATATTTTCTTTGTTCTGGTCTTAATTTATA  
actaatgaatattttccgctctgtgtattcggaaaagggggagttggaacataaaagatggggtgcagaaaagat  
gatcaggggaaggtgtgagtggtcaactagctgggcgtttggatagcgaagggtgcgtcctttgctggctctc  
gaattatgcaaactgctgcacttcagatactactacctacaaaaaaaaaacgaagagaaaaccccctaca  
aacaacgtattagtgtcatcgagcatttccaagccatttcattgacacgtagaacaccttttctgccaactc  
gtatgatgttatcatttaattcttgggaattaacacggacattgtcaaccgtaaagagctaattaatctagta  
aatgtgtcgcagctcattcacaatttctactacttgagagcggaggtgggtcgcgtttttggttctcc  
agaggatcccaatgctgacacgcttctccaggtggccgaggagtggaatggaaaatggcaggggttgcctc  
tcggggagctgcactaaaaccccaatgagatgcatgaattcctcttcgccgacaagcagctcataaaagttaac  
atcgaagtatttacagcatatttggggaaactcaacttggaaattgattaaatgcaactactgaaaacata  
caacttcaaatcaagatgtacaattttaaataagtagatctcttgaatttattgatttgcctaaccaactta  
agtttcttaacttctcttatttttggtaactattttggccacaaatc gatctttggtcgcgcc  
aaagtaatgaaccaaccgcacttttcaatctcgcattgatgcgttggattccacatatttggccagactgaa  
aaataattcatgtttatggccacgttggccaccggccaaaaatgcttatcgaacgccggagatcgcgaag  
cgagagactgtaaatattatgatttttgcgattttatcgcactgataaacgagttttccatcgcacagt  
tgcgatgtgcgaaaatgttttgggaagaaattgtcacttagccatac gattc gattcaccttctgtttgt  
ggaataataaatctgtagaaaggttgttattttagaagactccatcccccttgttattctatgtaaacga  
aaccttttctacacacatagctgcatagtaagttacctcatgagaacgttaggccgtgaatattgggtaaa  
tattaaactggttgcgattgtttggcaaaatcgttgcagttggtcaaacacgttttgagataatttaattaa  
atfacttggctttttaaaccgtccacgtgccactcgcagctcagtttgcctcgaatggagtggaacaa  
acttgacacttgccttaaaaatgcggcaagtgcatttgggtgggtgggtagtttagcttggtttggctggct  
ggtgaaaatcctaggaatcgaaaacttgggtgtctcggacggcagacaatgcaacaatgcatacgtacttg  
gatgaatcgtggcatctgtcgcagtccgtggagaatagaccgaaatccccgaactcacgagcatgatgtggc  
gatgatgacttgtgaaatcaagcaatgatttccactccatctgtaactaaatagattattttcacggtgtgt  
gttagccgctctcgcctctcattagtcggggcaccgggtaatttgataaggctcctggccccaggaacaaa  
ggacacactcgagagcgcagctggaaactaattaaatgttcgcgcctcaaatctctcgcctcgccttattat  
gacctgtgaatgtcttgcataatggacggagttgagatccttctcttctctttttgtttacgagtgc  
aaatgggacatttacatgcgagtcagtttgcataatggaattatcatggttctttaaagatggcgcaggatgt  
gatgtcgcgggaaaaggatgaggtttcctcaaggaaatcggaaatagaagtgtttctttcatgctaccaata  
tgggggcacataaaacttgcattgatgagctaaatgtaacatacactattaaatacatttttatgataagt  
gaacttaaaatcacactaactttgaaaattgattgacttcaaatgtgtgtttaaattcttattttata  
tttttaaatatcgaaaatctacaaatccgcttatgtttaaagtcaagccgctggctaattgacaaaatgtg  
aattgtggcgatgagagcttccgattgtcacttcccaacctccgtaatcccctaagtcaccataggggttg  
ggtaaaaatcaaatcgggagaatgtaccaacaaattatttagcaattggctagtgcgctagtccggcgccatgta  
aatccaattgtaacaatttgaatcaaatccgggggcacgccaccgaaagggggtggcatgggttaagggtca  
tgggttccatgacagctgtcg

### apS-CRM mutant stock 3.1

Green: primers to amplify the enhancer region and the deleted fragment.

Light blue: gRNA location

Red: deleted sequence

cacctaaagcggctcctagatataccggataccctagcataccggattttactgtataaaaggaagttgc  
gatcgaagctatatgatattttatgggtatgctgcaaccacatgctgatacaaaatcaagaatgatcacttata  
atgaattgtagacaaaatttgcagttcgcagcttatctcaggtcgtatttgcagtgatgcaattcacacctaatggttt  
taatccataaatccattgttttgggatgactgacgacgttttggtagtacaattaaaatgagcgcctccccgaga  
tcagagggtaaaactcacaatcaaacatcaagacagaaggaaatcaaatcttcatgcttagctccactttctagctt  
ttatagttcctgagattaagcggccatgtggacaggcggtagacagccggacggagatggctaagtcgacgtgtcct  
ccttcaaccgttacacttttcaacgaatatacaatagtaaactgatataaatgttccaacttaaggctaaagtgt  
cagcggactcatacaacccttcagacgaatttttcttcttcagagtcaagtcaaaaaaatccaaacatgggta

ttgaacagaacaagcaggaacgtaaataatccattaataaattgtgaattagaactatggctctgtccagtttacttgcct  
accgaatttggttttttcataatgtctgcccttgggttctaattgtgacaatcatcctatgttggcagagaagaat  
atgatgcgactgtgagcattgcgcagattggctattgtttaatggaatcagaacgagtagcggcaccggaatcaca  
ggagaactgctttatctgtcccaggcttggcaatattcttggcacactgtcatcaaattattatcggcgcgtg  
tcggggtgatataaaggaaatcactgttaggcctaactttacatgtctcatgcggttatactacgcttaactgtgtgc  
gcaagcgtctccactttatgtcaagggtcaaaagtgtttgtttacaacatattcattgcaactaatgaagtggtaac  
acttgatttggttcattaaggaccggggatgtgtttggttccaggtccgttgggaaccagcttcaaatgaagtatc  
acagcattatctttaaagcgttcagaacctccgcccgtcaatttgaacagcttttgggggtgggagtttaatt  
tgagggttgtgataaaaggcacaacaccctaattgaattatgcgggtgtggctctgcagcgactgctgttaggct  
gtggtattccgaaggagtagtaaaaggattcatcggcgggttgcgaacctttgcccgggaactgattagcagacaat  
atgtcaaagcttggcactgggagggtgaactctgtagcttacccttcaagcggcgttgcgactactccagggacagta  
ctcagggctcggctgataagggaataatgcatgacaaataaacggatacatgtctcggcaatagttttgcttattgccg  
gataataatcagctgaacaacaatggtctttgtcctggctatgctcctgctgctgggtgccacataaagaacaatc  
cgagcgcgcgccaacgagaattacaggatcgtttatggcaaccgctgtagcagctcctgtagcaccgctgcca  
aacaacctaaaggcattatctcaagtctcgccttccaggactatgttgcctcctgcaacctgctgtagatgctta  
tcgattacacggtgagcgtgaaatcattactccgaataaataaacgcatactcgttttctcaactgtattgat  
gtctcaatgagcgcgctgcccattggcaagggaaccattgcatcgcagatttagaccctggcactgtgtagtgtga  
aacacgtcgaattatgacctaaacgaatgccccggcgtaccgtcgtcttccggcagagtcgggaatgacatcaag  
ctccgattagtcacttttagttggttgggagccaagcagctgcctgccatccgcaactctcgtcttattgtttgccc  
catatctgtatttctgcacaactttgtgtgattacggcgataaagcggctcaagtaaatcacaataatcagcggct  
agtctggccgactcggctcgaagaaagtgtgaatagaccgggctcaacaatcaacaacaatggattcggcgaccgga  
ccagcaatgacaaatgtctctaggttatgagtgggcatgtcataaaagtcataagcaatagaataaataattgttgc  
acgtcatgggacacgtcaaaaaactgccgagaagcaattgcgcgacacttctgggtgtaaattaagatactttata  
gtgggggtggtgccgtggtcgttccgctggctactggtttgaaccaggggccacgaaaccagttccagctcaggccct  
tggtgaagccaagctggtggccagcttgggtttgtgtatcactcattgtattttgctcttgcagcgcagcagat  
atataatattgaaccgctagcatattcattgatttccgaacagtaattctgcaataatcattgcttcaactcgtgg  
gactagcacaaccatcttgcctccccgaccgtcccgcgaagaaatgccgtcacgtacgcgagccccatcgtcaac  
aataaagaatgaaccggtcctcggaaaggcgtggcatcgtatgatactgatcgttagtaaaattcgggtcaaat  
taggaggccagctcaaaatcagcgcacttttgaaggtaggcaggaaatcgaaatcggtagcctgtttataaatac  
gaaaataatgaatccattgcgggctggcaggacctaaagtgtggggcattttagccgagatcagaacggtcagctacc  
tgtggatgggtcccgaatcacacgaaatgctaaagctataaattagattttatctcgttccgcaggaataaaagga  
ggcaagcctcactgacgctcgtctcggagagctgtcgcataatggggcgatccaattaaagtggaattttatcat  
tttagcgtcagggccgggttagttctgttgggtcgttttactccgaaatattgctgacaaacggaaagcgtatgtt  
aaattattcagcgtgaaggattccatgaaccttcggcagagcctgggagtgagattcagagctggaattgaatcgttc  
agggggctacaccgctcgtatgaaacgatttttgcggccttctgattgactttactcaagattgacttcatgaa  
ggcaatttagaattgggctgataatcagctccggtacataagtcgctttattgccttattatgcacagtggtcattg  
cacactacggaagctgcactatgactgagggggtcataaagcgtaggtgagagggtctgttcgcccgggtaactgatt  
gtttgtctattgttcgctccgacttttcttccactgcttttacagggaaggacaagtattaatgtaaaatggtaac  
tggtcatctgaggcgcatttgggtctggctcgggg

### eya-CRM mutant stock 3.5

Green: primers to amplify the enhancer region and the deleted fragment.

Light blue: gRNA location

Red: deleted sequence

ctcaggatcacagaatccagcttctgggtatgctgtagtcgacgcccttcgacgttccgccaatggctgcgttgtttctgggttaa  
ccgttggcaggcctatgaaatggtgcttgaaccactcggccgtccggaaaacaacaacattgaggcatcgtgacaaattgaattgt  
aaacttgcgcgggcaacaacaacattggagacccccagggatgctgttccggttctgatccgtcgttccataaccatccgat  
tccggagtcagcaggaggaggaggaggaggagggagcagcagcccgacacggagggtgatgcgaatgccatgggacgctggta  
atccaataccatgcctatccatgttacgctcctctggacggactttctaactcggctcagttcggcggctcgggtctgtcctccaacc



at t t t t c t a a c t t t t g t t t g t a t t t a c t a t g t a t g a t t a c a t t a a t c t g a t t a c g g a t a g c a a t g g g c t g g a a a t a c a t t a t c a a t c a c a t t a c  
t t t c g a t t a t t c a a a a t a a c a t t t t a t t a t t t c a t t g a t t a c a t t c g g t t t a a c c t c g a a t c t t t c a t c g t a t a a c c a a a t t a a a g c a t t g  
g a a t t c a a t g a a g t a c a a a g a a c t c c c g a t t a g a a t g g c g t t g c a g t g a c c t g t c t g t a a g a a t t c c g a a a t a t a a a a t a a c c a a a a  
g c c g g a a g t a a t g c c a a c a g a t a g a t t g c t g c a c c c t c c c g c a g a a g c t a a g t t t a t g c a a t t c c g a a t a c c a t a t t a t g a a g c g t a  
a a t g t t a a a c c a g a t c c c c g g t a t a c c c a a a a c c c t g a g t g c g g c a a g a g c a a t g c a c a a a t g c a g g g c g g t c a c a a t c a t a t  
g c c t a c g t c a g t a a a g c a a a t c g c t g t g g g g g t t c c c c g c g t c a c t c c t a a a g a a g g a t a t a t g g c g g a t g g c a g a t g a a g c g g c  
g g a t g t a g c a g a t t g c a c g c c g g t a c a g a c a g c t g g c a g g g a a c c t g t c a g c g c a c t g c a a c a t a g g a g g t t g g a g c c a g c g g t a  
c t g t c g g c t t t g c t t c a c c a a t c c a t g c
