# Supplementary material for: Neuronal cell fate specification by the molecular convergence of different spatio-temporal cues on a common initiator terminal selector gene
Source: PubMed Central journal article supplement (PMC5411104; doi:10.1371/journal.pgen.1006729), 2017-04-17
Supplement: pgen.1006729.s009.pdf [file pgen.1006729.s009.pdf]

# SUPPLEMENTAL DATA 3

## Wild type and mutated CRMs

DNA sequence files of the wild type and mutated CRMs.

### col-dAp-CRM

ggatccactagtaacggccgcccagtgctggaattcgcccttcattttcgtgctctcatcgattcgggtgacca  
agcaggtgagttcaaaaatatttcaattagttatggatgaactcaacataaattataagaaatgggtgctataact  
agcaacggaacatacatgttttagaaaattagaaaatcataaataatatacattaataacaactcaagttttaatc  
ctttacacaacttgaaagaagtaatgcccaaacatctaatttgaataggttgagtaatttcctgcacagaaaact  
cgaaacaacttcaaaaaccacttaaatatatttgcgaaaattagcaattcatcttgcgattgccacttacataaatt  
aagaacttcttgattgccacgctgcttcaactgcaaatgaaggccaaagttaa**CCA**gg**CTA**c**Ga****AAAA**cc**AA****TTCC**  
**TT**t**CACT**t**GGCTG**cttccgtgcattttccctctttcccgacacga**TGTTTGT**TT**TGCTGATT****CGAGCATAAGTT**  
**GCATT****CGAAATTGATTGTCA**t**GGCTAATTAAGTG**t**GCCTGG**t**GTGCCT**t**TGGCC**a**ATAAATTGAG**t**CGT****Ca****AA**  
**CGAGCA**gctcgttccggccaggacttttccgacttttccgcgtgaaaaa**AAAGGGGTGT**ga**CCG**gggctaacgaga  
gaagcgagca**AA****TCGAGAGAA**tccgacggggatcgaaca**TT****GTTAATGCGCT**t**TGTTGTGGGTGCGTGC**ag**G****TCC**  
**T**ggggcattatactggtccttatagtc**CG**t**TGCACCATATGT**cc**GCTTTTGT**c**Gg**Cctaatgccctgcgagtc  
tttttcttgccct**CT**c**CT**t**TTTT**cg**CTTTTCAAGGGCAATTAATTTCTCGAGTGACAAATTTTATAGAC**attgg  
acgactcctttgcgctctcttccccattaacccccccccctctctctctcactccaatcgggtggcactact  
t**TCTC**ga**TTT**ct**CT**t**CGT****TTTTGTGGGCGTT**c**CT****TGCCA****TTTAGCCC**g**TTGC**-**ATCAGAAA**a**CGAG**ag**CGCAAT**  
**AAATTT**g**TCCACAAATTATCGACAGC**at**G**c**GACATC**t**CG**c**CCCC**t**TT**ctttactttatggtgacaaatccattt  
gtgcaatgca**ATTTAATCGCAAAA**ttatttgagcagccaccaattgaatttgctaaaaatatcacacagaaaa  
aaaaatggccgtaaaagaaaaggtctctgtgaagttttgtttaatttttttttaggctttgcccataagaagat  
tatttatgggcattgttttaggcaattaaagcttatcgacaaattgaatagcgcacatagagagttactttaatat  
agcaaatgagtaattacaagcagtt**TAATGGG**t**CTT**caaggaaacatacgaattcccgtgctaattgcgacagat  
tcccaaatggatactcattgtacaactcactcaagtttcaatttcacaataatcgaatacgaatcgggaagtaa  
aacatacatataagtatggatgttatattttctaagaataactattacatcccggttagttccttccctccgattt  
ccc**TAA**t**Tg**c**CA**tt**T**ctgcttgacttgtggcgtatttttgatagac**CTACCCCTAA**acctgggaaaaatcacac  
agctctgcgagttttgtgcccatttgaaaagtgtcgcaagc**TGGG**aaaagaa**CAATCA**tt**TGATC**g**GATTAGG**t**G**  
**GGTT**cggtgcctctttgtagaccctttgttttgcactggatgtttttgaa**TTTT**ac**ATTT**cgct**TGTCGCGT**t  
cgcttttct**TTATCG**gatt**GCGTAACAGGTAAGGCGGGGATAAGCG**a**GTGTTATC**tttagcaa**GTGGG**attgcaa  
ctcgaactcgaa**ACT**ggg**AACTGT**g**GC**ggggc**GAAT**g**CGATTAA**ggc**GG**a**AT**t**GTCTCA**atcgcaaatggcagg  
aag**GCAGGACAATTGT**caactgccatc**CACGTGGC**aggaccaaagaaaaaaatgaaaatccaaaaacaagc  
agcgacgaggcacaacccttgca**ACCCCTTT**cct**TT**c**GGGC**a**AA**T**G**cagc**Ag**c**AAATCATGG**t**CATAATCATAAT**  
**TACATT****CGATCAGATAAC**g**G**ccaaa**AA**c**GTT****CGAAC**g**GGAGGCGTCGCAAT****TGCAAT****TTGAGCTAACGA**t**G****c****AA**  
**c****CACGGAA**a**TCGC**c**TCATTT**cg**GCGATCATATTT****CATTTT****CATC**agcggatggtggatagatagactggtgcta  
taaggttccg**GCAT**a**AA****CA**a**Tg**c**CAA****TCC**t**TT**g**CCC**gg**TTTTT**g**TGTTTTG****CCAAAA****TTG**c**CTTATC**g**CG**  
**ATT**aaa**ACGCA**cgcac**AAAAGCGCA**t**CGAAAT**t**CTAA****ACC**aa**AAAGAGA**tggatagcgttcgaggggagagaggg  
agagacggcagataactggc**GATTAATGCA**ctga**GATAA**ctgagttatagtggttgaaaggagcccaaaaatcca  
ggcgaactactactaatgacaaagatccgtcaaccgggttaccggatttatccaaccgctacaacggttaaaacgaaa  
atcggaaagcagcatcattaaataccctatagccattgcaactgcacacacacacacacacactgcacacat  
gctgt**TGCTGCG**cg**Tg**c**TAATTAAG**c**GATAAAATTAATTTGT**a**TGTC****AACT****TTAAAA**c**GC**caaaaga**GAGAG**a  
**ATC****ATTTT****CGATTA**t**TAACA**a**ATT**gtacgagcaca**GCTCG**cttaatg**GCAAA**t**G****TTATT****GT****TGTTG**tcgctggc  
gcc**GCCGGCC**a**CTCAATAAATTCAACAGATTGCG**c**GAAATCTCC**a**CATTTGCAT**gtgcccgcctccgtccgctc  
ccgctcgcaccagcccgatttatggccctccccacgctgg**CTCTCCC**ttt**GCACGCAATGCGATTAAAAATGC**t  
ttta**TTT****CACGGCAAGTGCATTTCTGCGGT**cgaaagagatggcgtaaagagcagagagtgagtgagaaaaacagg  
cggaaaaatg**ATATCG**t**CCTCATTATGCGAAATGTG**t**AATGCA**t**GCG**gcatgctc**CCCTTT**g**AAA**t**CTTT**ttggc  
tcccttgggggaaacttcggttttataaaggtgtgcaaatgcactgcctatgtgggtgaaagcaatcttaactt  
taaataaatgagcaacgtaggttacatactttcgatgcttacaattgaaaatatttaaatcacaataatattta  
cattttcaaaaaaaaaaaaaaaaaacatagattggtttattgaaaggtcacaatgctctttagaattttttatcata  
attagaacaatcaataatttataactgcaaaaaaaggtatacacagctctgtatttcataaagtgcatatttc  
aatacgcttgcttatgtaatttttcaacaagctggcattacattgtaaccogtgccttaaggggcgaattctgc  
agatatccatcacactggcggcgcgc

### col-dAp D Kr-CRM

ggatccactagtaacggccgcccagtgctggaattcgcccttcattttcgtgctctcatcgattcgggtgacca  
agcaggtgagttcaaaaatatttcaattagttatggatgaactcaacataaattataagaaatgggtgctataact  
agcaacggaacatacatgttttagaaaattagaaaatcataaataatataca**ttaa**taacaactcaagtt**ttaa**tc

ctttacacaacttgaaagaagtaatgcccaaacatctaatttgaataggttgagtaatttcctgacagaaaact  
cgaacaacttcaaaaccactttaaatatatttcgaaaattagcaattcatcttgcgattgccacttacataaaatt  
aagaacttcctgattgccacgctgcttactgcaaattaaaggccaaagttaaCCAggCTAcGaAAAAccAATTCC  
TTtCACTtGGCTGcttccgtgcattttccctctttccggacacgaTGTTTGTTTTGTGATTTCGAGCATAAGTT  
GCATTGCAAAATTGATTGTCAAGGCTAAATAAGTGtGTCCTGGtGTGCCTtTGGCCaATAAAATTGAGtCGTCaAA  
CGAGCAgctcgttcggccaggacttttccgacttttccgctgaaaaaaAAAGGGGTGTgaCCGgggctaacgaga  
gaagcgagcaAATCGAGAGAAtcgcacggggatcgaacaTtGTTAAATGCGCTtTGTGTGGGTGCGTGCagGTCC  
TggggcattatactggtcctttagtccTGcTGCACCATATGTccGCTTTTGTcGgCctaatgcctgcgagtcc  
ttttcttgccctCTcCTTTTTcggCCTTTTCAAGGGCAATAATTCTCGAGTGACAAATTTTATAGACattgg  
acgactcctttcgcgctctcttccccattaaccccccccctctctctctcactccaatcgggtggcactact  
tTCTCgattTTTctCTtCGTTTTTGTGGCGTTcCTTGCCCaTTTAGCCGtTTCGcATCAGAAAaCGAGagCGCAAT  
AAATTTgTCCACAAATTATCGACAGCAtGcGACATCtgcCCCCtTTtctttactttatggtgacaaaatccattt  
gtgcaatgcaATTTAAATCGCAAAAatttttgagcagcccaattgaatttgctaaaaatatcacacacgaaaa  
aaaaatggcgtaaaagaaaaggctctctgtgaagttttgtttaaatttttttttaggctttgccgataagaagat  
tatttatgggcattgtttttaggcaattaaagcttatcgacaaattgaatagcgcataagagattactttaa  
agcaaatgagtaattacaagcagtTAAATGGGTCTTcaaggaaacatacgaattcccggtgctaaatgcgacagat  
tcccaaatggatactcattgtacaactcactcaagtttcaatttcacaataatcgaatacgaatcgggaagtaa  
aacatacatataagtatggatggtatattttctaagaataactattacatcccggttagttccttctcctcgattt  
cccTAAATtgcCCAatttccgcttgacttgtggcgtatttttgatagacCTACCCCTAAacctgggaaaaatcacac  
agctctgcgagttttgtgcccatttgaaaagtgtcgcaagcTGGGaaaagaaCAATCAattTGATCgGATTAGGtG  
GGTTcggctgcctctttgtagaccctttgttttcgactggatggttttgaaTTTTacATTTcgctTGTCGCGTGt  
cgcttttctTTATCGgattGCGTAACAGGTAAGGCGGGGATAAGCGaGTGTTATCtttagcaaGTGGGattgcaa  
ctcgaactcgaaACTgggAACTGTgGCgggcccGAATgCGATTAAggcGGaATtGTCTCAatcgcaaatggcagg  
aagGCAGGACAATTGTcaactgccatcCACGTGGCaggaccaaagaaaaaaaatgaaaatccaaaaacaagc  
agcagcaggacacacacccttgcaACCCCTTTcctTTcGGGCAATGcagcAgcAAATCATGGtCATAATCATAAT  
TACATTTCGATCAGATAACgGccaaaAACaGTTTCAAGCgGGAGCGTCGCAATTGCAATTTGAGTAAACGAtGgcA  
cCACGGAAAaTCGCtCATTTcgcGCGATCATATTTTCATCagcggatggtggtgagatagatagatggtgcta  
taaggtccgGCATAAAACAAtaGcCAAATCCTTTtgCCCggTTTTTgTGTTTTGCCAAAATTGcgCTTATCgCG  
ATTaaACGCAcgcacAAAAGCGCAcGAAATtCTAAACCaaAAAGAGAatggatagcgttcgaggggcagagagg  
agagacggcagataactggcGATTAAATGCActgaGATAActgagttatagtggttgaaaggagcccaaaaatcca  
ggcgaactactactaatgacaaagatccgtcaaccggttaccgatttatccaaccgctaaccgttaaaccgaaa  
atcggaaagcagcatcaataaccctatagccattgcaactgcacacacacacacacacactgcacacat  
gctgtTGTCTGCGcTgcTAATTAAGcGATAAAATAATTTGTaTGTCACACTTAAAAcGCaaaagaGAGAGa  
ATCATTTCGATTATTAACAaATTgtacgagcacaGCTCGcTaaatgGCAAATgGTTATTGTGTGTcgtggc  
gccGCCGGCCaCTCAATAAATTCAACAGATTGCGcGAAATCTCCaCATTTCATgtgcgccgcccctcgtcgtc  
ccgctcgcaccagcccgatttatggcccctccccacgctggCTCTCCCTttcGCACGCAATGCGATTAAAAATGCt  
tttATTTACGGCAAGTGCATTTCTGCGGTcgaagagatggcgtaaagagcagagagatgagtgagaaaaacagg  
cggaaaaatgATATCGtCCTCATTATGCGAAATGTGtAATGCAtGCGgcatgctcCCCTTTgAAATCTTTtggc  
tcccttgggggaacttcggttttataaagggtgtgcaaatgcactgccctatgtgggtgaaagcaatcttaaact  
taataaatgagcaacgtaggttacatactttcgatgottacaaattgaaaatattaaatacaataatattta  
cattttcaaaaaaaaaaaaaaaaaacatagattggtttattgaaaggtcacaatgctcctttagaattttttatcata  
attagaacaatcaataatttataactgcaaaaaaagggtatacacagctctgtatttcataaagtgcataatttc  
aatagcgttgcttatgtaatttttcaacaagctggcattacattgttaaaccggtgctcctaaggggcaattctgc  
agatatccatcacactggcggcgcgc

TTAA > GGCC

### col-dAp D POU-CRM

ggatccactagtaacggccgcccagtgctggaattcgcoccttcattttcgtgctctcatcgattcgggtgacca  
agcaggtgagttcaaaaatatttcaattagttatggatgaactcaacataaattataagaaatggtgctataact  
agcaacggaacatacatgttttagaaaattagaaaatcataaataatatacattaataacaactcaagttttaatc  
ctttacacaacttgaaagaagtaatgcccaaacatctaatttgaataggttgagtaatttcctgacagaaaact  
cgaacaacttcaaaaccacttaaatatatttcgaaaattagcaattcatcttgcgattgccacttacataaatt  
aagaacttcctgattgccacgctgcttactgcaaatgaaggccaaagttaaCCAggCTAcGaAAAAccAATTCC  
TTtCACTtGGCTGcttccgtgcattttccctctttccggacacgaTGTTTGTTTTGTGATTTCGAGCATAAGTT  
GCATTGCAAAATTGATTGTCAAGGCTAAATAAGTGtGTCCTGGtGTGCCTtTGGCCaATAAAATTGAGtCGTCaAA  
CGAGCAgctcgttcggccaggacttttccgacttttccgctgaaaaaaAAAGGGGTGTgaCCGgggctaacgaga  
gaagcgagcaAATCGAGAGAAtcgcacggggatcgaacaTtGTTAAATGCGCTtTGTGTGGGTGCGTGCagGTCC  
TggggcattatactggtcctttagtccTGcTGCACCATATGTccGCTTTTGTcGgCctaatgcctgcgagtcc  
ttttcttgccctCTcCTTTTTcggCCTTTTCAAGGGCAATAATTCTCGAGTGACAAATTTTATAGACattgg  
acgactcctttcgcgctctcttccccattaaacccccccccctctctctctcactccaatcgggtggcactact

tTCTCgaTTTctCTtcgtTTTTGTGGCGTTcCtTGCCCaTTTAGCCCgTTCGcATCAGAAAaCGAgagCGCAAT  
AAATTTgTCCACAAATTATCGACAGCAtGcGACATCtgcCCCCtTTtctttactttatggtgacaaatccattt  
gtgccaatgcaATTTAATCGCAAAAatttttgagcagccaccaattgaatttgctaaaaatatcacacacgaaaa  
aaaaatggccgtaaaagaaaaggtctctgtgaagttttgtttaatTTTTTTTTtaggctttgcccataagaagat  
tatttatgggcattgTTTTtaggcaattaaagcttatcgacaaattgaatagcgccatagagagttactttaatat  
agcaaatga**gtaattac**aagcagtt**TAATGGG**C**TT**caaggaaacatacgaattcccgtgctaaatgcgacagat  
tcccaaatggatactcattgtacaactcactcaagtttcaatttcacaataatcgaaatacgaatcgggaagtaa  
aacatacatataagtatggatggttatattttctaagaataactattacatcccggttagttccttccctccgattt  
ccc**TaAAT**Tgc**CC**attTtcgcttgacttgtggcgatTTTTgatagac**CTACCCCTAA**acctgggaaaaatcacac  
agctctgcgagttttgtgcccatttgaaaagtgtcgcaagc**TGGG**aaaagaa**CAATCA**tt**TGATC**g**GATTAGG**T**G**  
**GGTT**cggtgcctctttgtagaccctttgttttcgactggatgTTTTgaa**TTTT**ac**ATTT**cgct**TGTCGCGT**Gt  
cgcttttct**TTATCG**gatt**GCGTAACAGGTAAGGCGGGGATAAGCG**a**GTGTTATC**tttagcaa**GTGGG**attgcaa  
ctcgaactcgaa**ACT**ggg**AACTGT**g**GC**ggg**ccGAAT**g**CGATTAA**gg**GG**a**AT**g**GTCTCA**atcgcaaatggcagg  
aag**GCAGGACAATTGT**caactgccatc**CACGTGGC**aggaccaaagaaaaaaatgaaaatccaaaaacaagc  
agcgacgaggcacaaccttgca**ACCCCTTT**cct**TT**c**GGGC**a**AATG**cagc**Ag**a**AAATCATGG**T**C****ATAATCATAAT**  
**TA****CATT****CGAT****CAGATAAC**gGccaaa**AA**C**A**g**TT****CGAAC**g**GGAGGCGTCGCAATTGCAATTTGAGCTAACGA**T**G****CA**  
**c****CACGGAAA****TCGC****TC**attT**cg****GCGATCATATTTT****CATTTT****CATC**agcggatggtggatagatagactggtgcta  
taagggtccg**GCAT**a**AAACA**ata**G**c**CAAATCC**t**TT**g**CCC**gg**TTTTT**g**TGTTTTG****C****CAAAAT****TG**c**CTTAT****CG****CG**  
**ATT**aaa**ACGC**acgcac**AAAAGCGCA**t**CGAAAT**t**CTAAACC**aa**AAAGAGA**tggatagcgttcgaggggagagagg  
agagacggcagataactggc**GATTAATGCA**ctga**GATAA**ctgagttatagtgggtgaaaggagcccaaaaatcca  
ggcgaactactactaatgacaaagatccgtcaaccggttaccogatttatccaaccgctaaccggttaaaacgaaa  
atcgaaagcagcatcattaataacctatagccattgcaactgcacacacacacacacacactcgcacacat  
gctgt**TGTCTGCG**cgTg**TAATTAAG**c**GATAAAATTAATTTGT**a**TGTC****AACTTAAAA**c**GC**caaaaga**GAGAGA**  
**ATC****ATTTT****CGATTA**t**TAACA**a**ATT**gtacgagcaca**GCTCG**c**ta**atg**GCAAA**Tg**GTTATTGTTGTTG**t**cg**ctggc  
gcc**CGCCGCC**a**CTCAATAAATTAACAGATTGCG**c**GAAATCTCCA**c**CATTTGCAT**gtgcgccgcccctccgtccgctc  
ccgctcgcaccgcccgatattatggcccctccccacgctgg**CTCTCCC**tttc**GCACGCAATGCGATTAAAAATG**Ct  
ttta**TTT****CACGGCAAGTGCATTTTCTGCGGT**cgaaagagatggcgtaaagagcagagagagtgagtgagaaaacagg  
cggaaaaatg**ATATCG**t**CCTCAT****TATGC****GAAATGTG**t**AATGCAT****GCG**gcatgctc**CCCTTT**g**AAA**t**CTT**ttggc  
tcccttgggggaacttcggttttataaaggtgtgccaatgcactgcccctatgtgggtgaaagcaatcttaactt  
taaataaatgagcaacgtaggttacatactttcgatgcttacaattgaaaatatttaaatcacaataatattta  
cattttcaaaaaaaaaaaaaaaaaacatagattggtttattgaaaggtcacaatgctctttagaattttttatc**ata**  
**atta**gaaacaatcaataatttataactgcaaaaaaaggtatacacagctctgtatttcataaagt**gcata**tttc  
aatacgcttgcttatgtaatttttcaacaagctggcattacattgtaaccgctgtccctaaggcgaattctgc  
agatatccatcacactggcggccgc

**gtaattac** > **TGCCGGCA** on the plus and on the minus strand double site  
**ATAATCATAATTAC** > **CGCCGACGCCGGCA** on the plus and minus strand double site

**Attggaata** : initial attt is from the reverse octamer like sequence which  
can be bound by POU as well. **ATTCAAA** attt sites will be converted to **CGGG**

**TATGC**/**GCATA** > **GCGTA**  
**TATTC**/**GAATA** > **GCGGA**  
**ATGCAAA**/**ATTTGCAT** > **CGGGTACG**  
Ataatta > **CGCCGGC**

### col-dAp D GATA-CRM

ggatccactagtaacggccgcccagtgctgctggaattcgcccttcattttcgtgctctcatcgattcgggtgacca  
agcaggtgagttcaaaaatatttcaattagttatggatgaactcaacataaattataagaaatgggtgctataact  
agcaacggaacatacatgtttagaaaattagaaaatcataaataatatacattaataacaactcaagttttaatc  
ctttacacaacttgaaagaagtaatgcccaaacatctaatttgaataggttgagtaatttcctgcacagaaaaact  
cgaacaacttcaaaaaccacttaaatatatttogaataatagcaattcatcttgcgattgccacttacataaatt  
aagaacttctgattgccacgctgcttcaactgcaaatgaaggccaaagttaa**CCA**gg**CTA**c**Ga****AAAA**cc**AA****TTCC**  
**TT**t**CACT**t**GGCTG**c**tt**ccgctgcatTTTTccctctttccoggacacga**TGTTTTGTTTTGCTGATT****C****GAGCATAAGTT**  
**GCATT****CGAAATTGATTGTCA**t**GGCTAATTAAGTG**t**GTCC**T**GGT****GTCC**t**TGGCC**a**ATAAAT****TGAG**t**CGT****Ca****AA**  
**CGAGCA**gctcgcttccggccaggacttttccgacttttccgctgaaaaa**AAAGGGGTGT**ga**CCG**gggctaacgaga  
gaagcgagca**AATCGAGAGAA**tgcacggggatcgaaca**T****GT****TAATGCGCT**t**TGTTGTTGGGTGCGTGC**ag**GTCC**  
**T**ggggcattatactggtccttatagtc**CTG**c**TGCACCATATGT**cc**GCTTTTGT**c**Gg**C**cta**atgcccctgcgagtc  
ttttcttgccct**CT**c**CT****TTTT**cg**CTTTTCAAGGGCAATTAATTTCTCGAGTGACAAATTTTTATAGAC**attgg  
acgactcctttcgcgctctcttccccattaacccccccccctctctctctcactccaatcgggtggcactact  
t**TCTC**ga**TTT**ct**CT**tcgt**TTTTGTGGGCGTT**c**CT****TGCC**a**TTTAGCCC**g**TTCG**c**ATCAGAAA**a**CGAG**ag**CGCAAT**

AAATTTgTCCACAAAT**TATC**GACAGCAtGcGACATCtgcCCCC**TT**tctttactttatggtgacaaatccattt  
gtgcgaatgca**ATTTAATCGCAAAA**atttttgagcagccaccaattgaatttgctaaaaat**tatc**acacacgaaaa  
aaaaatggccgtaaaagaaaaggtctctgtgaagttttgtttaatTTTTTTTTtaggctttgccc**gata**agaagat  
tatttatgggcattgTTTTtaggcaattaaagct**tatc**gacaaattgaatagcgcacatagagagttactttaatat  
agcaaatgagtaattacaagcagtt**TAATGGG**C**TT**caaggaaacatacgaattcccgtgctaaatgcgacagat  
tcccaaatg**gata**actcattgtacaactcactcaagtttcaatttcacaataatcgaaatacgaatcgggaagtaa  
aacatacatataagtatggatggtatatttttctaagaataactattacatcccggttagttccttccctccgattt  
ccc**TA**AAT**Tgc****CC**Att**T**tcgcttgacttgtggcgtattttt**gata**gac**CTACCCCTAA**acctgggaaaaatcacac  
agctctgcgagttttgtgcccatttgaaaagtgtcgcaagc**TGGG**aaaagaa**CAATCA**tt**TGATCg****GATTAGG****TG**  
**GGTT**cggtgcctctttgttagaccctttgttttcgactggatggtttttgaa**TTTT**ac**ATT**T**cgct****TGTCGCGT****G**  
cgcttttct**TTATCG**gatt**GCGTAACAGGTAAGGCGGG****GATA****AGCGa****GTGTTATC**tttagcaa**GTGGG**attgcaa  
ctcgaaactcgaa**ACT**ggg**AACTGTg****GC**ggg**ccGAATg****CGATTAA**ggc**GGa**AT**tGTCTCA**atcgaaatggcag  
aag**GCAGGACAATTGT**caactgccatc**CACGTGGC**aggaccaaagaaaaaaatgaaaatccaaaaacaagc  
agcgacgaggcacaacccttgca**ACCCCTTT**cct**TT****GGGC**a**AA**T**G**cagc**Ag****AAATCATGG**t**CATAATCATAAT**  
**TACATTCGATCAGATAAC****G**ccaaaa**AA**c**GTT****CGAAC****g****GGAGGCGTCGCAATTGCAATTTGAGCTAACGA****Tg****GC****A**  
**cCACGGAA**aa**TCGC****TC**ATT**T****cg****GCGATCATATTTT****CATTTT****CATC**agcggatggtg**gatagata**gactggtgcta  
taaggtccg**GCAT**aa**AA**CA**ATa****G****CAAATCC****TT**tg**CCC**gg**TTTT**g**TGTTTTG****CCAAAATTG****cg****CT****TATC****g****CG**  
**AT**Taaaa**AC****GC**a**cg**cac**AAAAGCG****CA****CGAAAT****C****TAAACC**aa**AAAGAGA****t****gata**g**cg**ttcgaggggagagag  
agagacggc**gata**actggc**GATTAATGCA**ctga**GATA**Actgagttatagtggttgaaaggagcccaaaaatcca  
ggcgaactactactaatgacaagatccgtcaaccggttaccogatt**tatc**caaccgctaaccggttaaaacgaaa  
atcgaaagcagcatcattaataccctatagccattgcaactgcacacacacacacacacactcgacacacat  
gctgt**TGTCTGCG****cg****T**gc**TAATTAAG****c****GATA**AAATTAATTT**GT**a**TG****TCAACACTTAAAA****c****GC**caaaaga**GAGAG****a**  
**ATC**ATTTTC**GATTA****T****TAACA**aa**ATT**gtacgagcaca**GCTCG**cttaat**G****CAAAT****g****GTTATTGTTGTTG****T**cgctggc  
gcc**CCGCGC****a****CTCAATAAATTCAACAGATTGCG****c****GAAATCTCC****a****CATTTGCAT**gtg**gc**cgccctccgtccgctc  
ccgctcgcaccagcccgatttatggccctccccacgctgg**CTCTCC**ctt**c****GCACGCAATGCGATTAAAAATGC****t**  
ttt**TTTTCAGGCAAGTGCATTTCTGCGGT**cgaaagagatagtcgtaagagcgcgagagagtgagtgagaaaaacagg  
cggaaaaat**gATATCG****t****CCTCATTATGCGAAATGTG****AATGCA****T****GCG**catgct**CCCTTT****g****AAA****TC****TT**ttggc  
tccttgggggaacttcggttttataaaggtgtgccaatgcaactgcctatgtgggtgaaagcaactcttaactt  
taataaatgagcaacgtaggttacatacttccgatgcttacaattgaaaatatttaaatcacaataatatttta  
cattttcaaaaaaaaaaaaaaaaaacatagattggtttattgaaaggtcacaatgctctttagaatttttt**tatc**ata  
attagaacaatcaataattttataactgcaaaaaaagggtatacacagctctgtatttcataaagtgcataatttc  
aatagcgttgcttatgtaatttttcaacaagctggcattacattgtaaccogtgtccctaagggcgaattctgc  
a**gatatc**catcacactggcggccgc

GATA-binding AGATAA and TGATAA

**GATA** > TCGC

**TATC** > GCGA

### col-Tv-CRM

gcgccgctgatagaagtagggtattttctaacaagtacaattaatagacatatgtacttttttcagtaaaaat  
taccaattttttcagcactacttaagccaatctaccaccttaattccgttttttttcttttgaacacatgaaaaa  
**ATTC**AA**TT****cc**t**at****GA****T****T****AT****TA****AT****C****t****a****A****T****g****A****A****T****CC****a****CA****A****AT****T****T****G****t****T****GC****CA****T****T****T****g****T****T****g****c****ag****AA****g****T****A****T****T****T**  
**TGA**ATTT**CC****CAC****AG****TT****cg****T****G****CA****AAAA**atgtacaatattg**AAT**ac**GAA**aa**AG**tca**GGA**aa**AA**ttccattc  
TTTTtct**CGC**aa**AA**AT**g****T****G****AC****a****G****AG****CA****AA**atgctgaccc**CGC****TACT**a**GGA**AAAA**ATA****TCC****CC****AG****TC****GAT****T****g**  
a**AC****GAT****TT****A****T****A****T****T****T****GG****cc****CAG****CC**aaactcggagcctgtcccggaatacc**CGGA**ACC**ATTAAT****CAT****c****CG****AG****T****cc****A****G**  
**AT****CC****a****AG****T****CC****g****ag****t****cc****g****ag****t****gg****t****gg****a****c****ag****gc****gg****c****att****g****ca****att****gg****t****gg****a****c****at****TT****t****GG****ag****t****GAA****g****AAA****c****TT****TT****GC**  
**GG****t****AC****G****T****GG****CA****AC****GT****T****T****G****AA****AT****T****AC****AAA****AT****GT****G****T****T****A****AAAA****a****TG**aaagagcagggcgggttaaaagc**AAAA****TAA****t**  
**AT****AT****TT****c****att****CACACACAGAC**ttttgtctctgctccgcgctccatata**AAAAAACATAAAATTTCTTTGAGAATAG**  
**A**acttctgggatggagagggggggggggggg**g****CA****AG****GT****G****A****T****T****A****T****g****TT****T****G****AC****AG****CC****GC****AC****t****GG****GA****c****ac****g****a****G****c****a****c**  
**CG****CC****cc****TT****tt****tc****at****c****G****CC****a****AC****AG****G****A****C****A****T****GG****g****t****a****T****AG****a****TC****CT****G****g****cc****aa****ag****t****g****cc****aa****act****gg****cc****t****ca****ct****tt****cc**  
**G****t****CT****G****A****T****T****A****cg****g****cc****a****act****a****tt****tt****g****tt****ta****a****tt****tt****t****a****cc****act****tc****cc****t****g****ct****at****cg****a****ct****ca****act****ta****aa****ac****at****ata**  
aaaccaactattttaagagcaataaagttcaatttgattttctttggccttcgtaataattttctgcatctc  
tctg**GGG****A****t****c****G****c****a****AAA****A****T****A****T****G****A****tt****a****TT****g****AA****AC****AG****CT****G****AA****g****aa****at****A****A****T****a****a****CC****AA****A****T****cg****g****a****ag****g****cc****aa****at****c**  
tgtttaatgtttcagatatgttgggtggtgggtgaccaaagcaaatatgcttttttag**C****t****T****c****AA****CT****T****CC****T****CA****A****g****c**  
**g****AA****AT****T****G****A****T****T****T****C****A****tg****g****t****t****t****t****ct****g****t****t****t****t****tc****g****ct****aa****aa****at****ACA****c****AAAA****g****ag****t****cg****A****AAAA****a****tt****t****g****act****gt****g****att**  
gtcacttgaatgtgtgggttgggaa**A****CC****A****c****T****C****a****A****AT****CC****A****C****t****cc****ca****aa****at****at****gt****c****ag****t****A****T****G****G****a****A****T****C****A****C****G****A****acc**  
**t****c****G****ct****T****G****A****T****T****T****CT****C****AG****T****G****A****T****T****T****TC****G****CA****A****T****C****AG****cc****T****G****A****T****G****A****G****G****A****T****G****T****G****C****cg****ag****a****ac****g****t****t****g****ct****Ca****T****G****g****ag****GC****ag****T**  
**g****CT****A****T****G****A****T****T****A****G****T****A****T****C****T****t****t****c****ag****cc****ag****gt****ca****aa****ag****t****g****ac****g****ct****g****cc****GC****A****T****G****CC****A****A****G****T****G****G****C****ct****gg****c****C****aa****A****T****G****AA****A****C****T**  
**T****T****A****A****T****G****c****g****aa****aca****agg****a****ca****aa****agg****ct****g****aa****aga****agg****ct****g****cc****t****g****at****g****a****act****a****cg****t****g****at****g****gt****c****ag****a****ca****a****att****g****a****ag****tt**  
aactggaaaataattagctaattttcctagtttgcttaggttaagggattaagtaagaatgtgtttaaggactc  
ttttataggttaacttgttactctaaagaaaacttatccacagaatagatgtgctatttttatcgcagtgatgtg

ata**GTCAacGACAAAGTGaAATGcaTTGAGG**ttgggtggcgaacaaacgcgacctgaatcgcgcaattggaatagcc  
agcctactccgccccctcaggatatatagctacttccgactagcatatgcccagatagtagctggcgtatcaa  
tttcgataatgtacttggaccgca**GTATCTTTTATTaTCCT**gac**TGCTGTGCAATTATT**tccgactgctttactg  
tcgtaccgcttttccgag**TCCTGGGAAA**c**GCAAAACA**a**GG**at**ATTTTCGcGCACACGcC**tcggac**ATGATTGCATC**  
**CG**ggca**GGAAGC**att**Tg**cg**CGTGT**ccctttt**GCATCC**t**TACAT**cg**tc**g**CT**t**CCTTCC**tggcgatcagaacccctg  
gctgctt**TT****CATCCGCAATTTT****CACGCCCACTTTGTTT****GATGATGACAAATCTCGTTGCGTGT****TATCAGATTGGC**  
caactttccggttgcattccccctcg**AT**t**GCATAATTATGTTTATCTT**t**GGA**agctg**cg**ctcctgcccagtg**tc**  
cttgcggtttggtagcttccctg**cg**at**ttt****GCTcGGA**acg**AG**t**GgCACGTGCTAATCGGCGGT****CG**tctg**ca**c**CG**  
**CC**atgcaaccagccacccccctggtaagt**g**caa**CCCCGC**cta**ACA**t**gtCCGATAATTGAAATCGCTAAGC**t**g**aa  
caacggaatcgaaatggcttcattaatcaggtcacttcgatggcagcgcataatg**tt**cttcaaaaattg**aa**ttg  
ggggcggttgaaaagagaaattgg**tc**tatatagcacttagcgcgattg**aa**ttg**tc**attttg**tg**ttac**ct**aat  
tggggaaaagatg**tt**ccggtt**aa**tcatgagtgatacttactattg**ta**ttacaaa**aa**tggtg**ca**tatatcaga  
agatatatatt**aa**tagatct**aa**aggagcattt**g**tatccattc**ca**aaa**aa**atggt**aa**aaa**aa**agct**aa**at  
taaattt**g**ctcattt**ac**ct**TTAA**ggacatcc**tt**gct**TAATGAGTGC**a**CTCA**t**g**cc**ca**cc**ca**ct**cg**caac**CGA**  
**ATGAGTGTGCGCCCTGcGGACGCATAAAATTATaAATAAAA**g**CC**t**CaCACACGTGGAGA**aagagaggtgatataac  
cttagagagagagagagagagggagagct**aCAGTCTGAGGCCaAGaAGTGTgCTAAATATTTAA**g**ACT**t**AAAACA**  
**TAAACCTGAGTATTTATAAAATT**ggctt**aa**caagctcgatgtgacgg**tg**ggttgggtg**tg**ctg**tg**gg**CtGAC**  
**CCTTTTT**t**ccGG**gcacaaggatctgctcgactcgattccat**TCAT**t**AGAAATGCTcACTAATGTGCCG**a**CTTAAT**  
**AATAATCAAATTTATATGCATGGTTATGTCCTT**A**g**agcaggaccacaaaactg**aa**g**tt**ccgag**tg**gattg**cg**aa  
tgggattggctg**ta**ag**tt**acggagaaac**ct**ttgag**aa**tgagacgaagata**aa****TGTC****AAATATCCTTG**ttt**cc**  
aaaatg**tc**gacc**aa**ag**tg**cgatg**tc**cgat**cc**g**aa**acacgccc**aa**gac**cc**g**ta**ccg**tt**att**ct**g**ct**accag**t**  
tttctt**g**ttt**g**ttt**g**ttt**g**ttt**g**ttt**g**ttg**cc**agctt**g**ttt**g**ttg**cc**gacactgagacc**aa**aa**ag**g**cc**aa**aa**ag**g**tc**gc**  
ccctcg**g**attt**cc**ttag**tc**ctg**tc**g**cc**agctt**cc**tt**cc**acatt**ct**ttt**g**gg**g**tc**cc****GATGAG**a**TTG**a**AA**  
a**TT**c**ACAAAAATTAATTA**ggaatg**tc**gg**ca**tc**ca**tg**tt**g**tg**atag**g**ctag**tt**ctt**ct**ag**cc**tag**ca**acattt  
ttgatg**tg**act**aa**agag**aa**tc**CTTT**a**TGGCCA**cac**cc**g**ga**ata**ct**catt**ct**ca**aa**ca**ca**ag**cg**ca**aa**ta**aa**  
a**ca**aaatt**ca**aat**tg**ca**ca**aat**gg**cag**cg**g**ca**gca**aa**acatt**tg**agacattt**cc**ca**ca**ca**ca**ca**ca**gagac  
acacata**ct**cg**tt**aaat**ga**acatt**tg**cag**gc**actagatatttatttattacag**gg**tt**g**ca**ct**gag**g**ca**at**  
taacc**ct**tactg**cc**ac**gg**cag**tc**cgag**ca**ac**gg**ag**g**act**g**a**AAAAATTGAAATAAAAT****TACCAAAACTAAAG**  
**CAACA****ACTGTTTCGATAAATGAAGTCAAATATATTT**g**TgCCT**aa**gt**g**ca**ctgagag**aa**tt**ta**ataac**ct**atg  
at**tt**acag**ca**tgat**tt**ccgat**ct**ttg**ca**acatt**tt**ttgag**tg**aa**ac**tag**g**aa**ac**ctt**ta**caag**cg**agat**ct**g  
cag**tt**ctt**ta**g**tt**ct**aa**gcattatt**ct**ag**ta**ttt**ta**aa**at**atattt**cc**ttt**g**tt**ct**g**gt**ct**ta**att**ta**tata  
actaat**ga**atattt**cc**g**tc**g**tg**tatt**cc**g**aaa**ag**gg**gag**tt**g**ga**acata**aa**agat**gg**g**tg**ca**g**aa**ag**at  
gatcag**g**aa**gg**tg**tg**ag**tg**g**tt**ca**aa**actag**tc**gg**cg**ttt**g**g**at**ag**cg**a**AGGGTGcGTCC**ttt**g**c**TGGTCTT**  
g**AATTATGCAAAAT**cg**tc****TGCAC**ttcagata**ct**act**ac**cc**ct**ca**aa**aa**aa**aa**aa**aa**aa**acgagag**aa**ac**cc**ct**ca**  
a**ca**aa**cg**t**ATTAG**t**GCAT**C**gaGCATT**t**GCC**a**agCCATT**t**CaT**t**GACAC**g**Tag**aacac**ct**ttt**tc**g**tc**ca**ct**t**c**  
g**at****GATGTTATCATT****TAATTC**t**TG**gg**GAATTAACACGGACATTG**t**CA**a**CcGTAAATGAGCTAATTAATCTA**g**TA**  
**AA****TGT**g**TGC**ag**ct**catt**cc**aca**at**tt**ct**act**act**tgagag**cg**ag**g**ag**tg**g**g**tt**cc****GCGTTTTTGTGGTTCTCC**  
**AGAGGATCCCCA**at**GcTGACACGCTTCTCCAG**g**TG**ccgag**g**ag**tg**g**g**aa**at**g**g**aa**at****GGGC**a**GG**gtt**tc****CCC**  
t**cg**g**GG**a**GCTGCAC**t**AA****ACcC****CAAATGAGATGC**a**GAATTC**ct**ct**tcg**cc**gaca**ag**cag**ct**cata**aa**ag**tt**aa**c**  
at**cg**ag**ta**ttt**ta**cag**ca**tattt**g**gg**g**aa**ac**tt**ca**act**tg**g**aa**ttt**g**att**aa**atg**ca**aa**ct**act**tg**aa**aa**acata  
caact**ca**aat**ca**ag**ta**tg**taca**at**tt**ta**aa**at**ca**ag**ta**g**at**ct**ct**ttg**aa**ttt**ta**ttgattt**g**ct**ta**acca**act**ta  
ag**tt**ct**ta**act**ct**ctt**at**ttt**g**tg**ta****TTTTGGCTAACT**at**TTTTGGCCA**c**AA**at**C**gat**ct**ttg**tg**tcg**cc**  
aa**g**tt**aa**tg**aa**cc**ac**cg**ca**ctt**tt****CCAATCTCGCACT**ttgag**tc**g**ct**g**g**ttg**g**att**cc**aca**TATTTGGcCAG**act**g**aa  
**AA**a**ATTTTcaTGTTTATGGCcAcGTTGTTTTCCAGG**c**GcCAC**a**AAAA**t**GCTTATCGA**c**gc**cg**GAGAT**g**cc**aa**g**  
cgagag**aCTTGTA**AA**ATTTTATGATTTTT**ttg**cg**at**tt**tt**at**tcgactgata**aa**acgag**tt**ttt**cc**ca**ct**gc**ca**g**t**  
t**gc**g**ATGTG**c**g**aa**at**g**tt**ttg**gg**aa**aa**att**tg**g**ca**cc**ta**g**cc**ata**cg**att**cc**gatt**cc**ctt**ct**g**tt**g**tt**  
g**g****ATAA**a**AAATC**t**G**t**AGAA****GGT**t**gt**g**ta**t**TTTT**agaag**act**ccat**cccc**ct**TTgTTaTTCT**t**AtGTAACGA**  
**AAC****CTT**ttt**ct**acacacatag**ct**g**ca**tag**ta**ag**tt****ACCCTCA**t**GAGAACGTTTAGC**ccg**tg**aa**at****TGGGTAAA**  
**TATTTAAACTGGTTgCGATTGTTTTgGCAAAATCGTTGCAGTTGGtCAAACACGTGTTGAGATAAT**t**AATTA**  
**ATTTACTTGcTTTTTT**a**accCgTGCCACGTGCCACT**cgag**tc**ca**g**ttt**g**ctg**cc**ct**cg**aa**at**g**g****AGTGCCAAAC**  
**ACT**t**GAGCACTTGCT**tt**aa**AA**TGcGGCAAGTGC**attt**gg**g**tt**g**gg**g**g**tag**tt**ag**ct**g**g**ttt**g**g**ct**g**g**ct  
g**gt**g**aa**aa**TTC**ctag**GAATcGAAA****ACTTTGGTGGTCT**tcg**g**ac**gGC**a**GACAATGCAAC**a**TGTC**a**ac**g**ta**ct**TG**  
**GAT**g**aa**tc**gc****TGGC****ATC**t**GTC**g**ca**g**TCCG**t**g****GAGA**at**Ag**ac**cg**A**aATTCCcCCGAA**ct**ca**cgag**cATGA**t**g**g**G**  
**GATGATGACT**t**G**g**AAATC**aa**GCA**atgatt**cc**act**cc**at**CTG**t**AaCTAAATATGATTTAT**t**T**c**CACG**g**tg****GT**  
g**tt**ag**cc**g**ct**ct**CgCCcC**t**CTCATTAG**tcg**gg**g**ca**cc**gg**g**g****TAATTTGCATAAGGTCTTGCCCCAGGA**acc**AAA**  
g**g****AC**a**CAC**tcgagag**cg**ag**ct****GGA**a**ACTAATTA**AA**ATGTT****CGCGcTCAAATTTCC**tt**cg**C**tCG**cc**CtTATTTAT**  
**GaCCCTGTGAATGTCT**t**GCATATGGA**c**gg**ag**tt**gagat**cc****TTCT**cg**tt****TT**ct**TCCTTTTTTTGTTTACGA**g**TGAC**  
**AAATG**g**g****ACATTTACATGC**gag**tc**ag**t****TTGCATAT**g**g****AATTATTCATGGTT****CT**tt**aa**agat**gg**cg**c**ag**g**atg**t**  
gat**g**tcg**gg**g**aa**ag**g**atgag**g**g**tt**ct**ca**ag**g**aa**g**tcg**g**aa**at**aga**g**tg**g**tt**ct**ttt**ct**atg**ct**acca**aa**  
tggggg**ca**ata**aa**act**tg**cattt**g**atgag**ct**aa**at**g**ta**aa**ca**tac**act**at**tt**aa**ata**cattt**tt**atg**aa**g**t**  
g**aa**ct**ta**ag**tc**ac**act**aa**ct**ttt**g**aa**aa**ttt**g**attgactt**ct**aca**at**g**tg**g**tt**g**tt**taatt**ct**at**tt**ta

tttttttaaatatcgaaaatctacaaatccgcttatgttttaaagtcaagccgctggctaattgacaaaatgtgt  
aattgtggcgatgagagtccttccgattgtcactctcccaaccctccgtaatcccctaagtcacataggggttg  
ggtaaaaatctaga

**col-Tv D Cas-CRM**

gcgccgctgatagaagttaggtatttctaacaagtacaattaatagacatatgtacttttttcagtaaaaat  
taccaatttttcagcactacttaagccaatctaccaccttaattccgttttttttcttttgaacacatgaaaaa  
**ATTCAATT**cctta**GATTTAATTAAT**Cta**ATgAaATCCacaAATTTG**t**TGCCATTTgTT**gtgcag**AAgTA****ggcc**  
**TGAATTTGCACACGTT**cg**TTGgC****ccgg**Aatgtacaaatattg**AATacGAAaAA**gtcaa**GGAaAAA**ttccattc  
t**TTTTctCGC**aa**AAATg****GTGACaGAGCaAAA**atgctgaccgc**CGCCTACTaGG****ccgg****ATAaTCCCCAGcCGATT**tg  
a**ACGATTTATTATTTGG**cc**CAGCC**aactcggagcctgtcccggaatacc**CGGAACCATTAATCATcCGAGT**cca**G**  
**ATCCaAGTCC**gagtcggagtggtggacagggcggcattgcaattggtggacat**TTtGG**agtg**GAAgAAA**c**TTTTGC**  
**GGtACGTGGCAACGTGTTGAAATTACAAAATGTGTT****ccgg**A**TG**aaagagcagggcgggtaaaaagc**AAAAATAA**t  
**ATATTT**catt**CACACACAGAC**ttttgtctctgctccgcgctccatat**ccggAACATAAAATTTCTTTGAGAATAG**  
**Aa**cttctgggatggagagggggggggggggg**CAAGGTGATTATgTTTGACAGCCGAC**tt**GGGA**cacgaa**Gcac**  
**CGCC**cc**TTTT**ctatc**GCCAaACAGGACATGG**gtatt**AGaTCCTG**gccaaagtgccaaaactggcctcactttcc  
**GtCTGATTTA**cggccaaactattttgtttaaatttttaccacttccctgctatcgacactcaacttaaaacatata  
aaaccaactatttaaagagcaaaataaagttcaatttgattttctttggccttcgtaataattttctgcatctc  
tctg**GGGAT**ca**GcgaAAAATATGA**atta**TTgAAACAGCTGAA**gaaat**AATA**aa**CCAAAT**cggaaggccaaatc  
tgtttaatgtttcagatatgttggtgtgggttgaccaaatgacaatatgcttttttag**CtTcAACCTCCCTCAA**gc  
**gAAATTGATTTTCAT**ggttttttctgttttttcgcctaaaaat**ACA**c**AAAA**gagtcg**AaAAA**atttgactgtgatt  
gtcacttgaatgtgtgggttgggaa**AACCA**c**TC**ca**ATCCAC**ttcaccaaatatgtcagta**TGGaATCACGA**acc  
tc**GctTGATTTCTCCAGTGAT****ggccCGCAATCAG**cc**TGATGAGGATGTGC**cgagaacggttgc**CaTG**gag**GCagT**  
**gCTATGATTAGTATCCT**ttcagccaggtcaaaagtgaagctgccc**GCATGCCAAGTGGCC**tcggc**CaaATGAAACT**  
**TTAATG**cgaacaaggacaaaaggctgaaagaaggctgctgatgaactacgtgatggtcagacaaattgaagtt  
acattgaaaaaattagctaatttcctagtttcttaggttaagggattaagtaagaatgtgtttaaaggactc  
tttataggaacttgttactctaaagaaaacttccacagaatagatgtgctattttatcgcagtgatgtg  
ata**GtCAacGACAAAGTGaAATG**ca**TTGAGG**ttggtggcgaacaaacgcgacactgaaatcggaaatgacc  
agcctactccgccccctcaggatataatagctacttccgactagcatatgcccagatagtagctggcgatcaaa  
tttcgataatgtacttggaccgga**GtATCTTTATTaTCCT**gac**TGCTGtGCAATTATT**ccgactgcttactg  
tcgtaccgcttttccgag**TCCTGGGAAA**c**GCAACAA**ggat**ATTTGC**c**GCACACG**c**C**tcggac**ATGATTGCATC**  
**CG**ggca**GGAAGC**at**Tg**cg**CGTGT**cc**TTTTGCATCC**t**TACAT**cg**tcgCT**c**CCTTCC**tgcgatcagaaccctg  
gctgctt**TT****CATCCGCAATTTT****CACGCCCACTTTGTTT****GATGATGACAAATCTCGTTGCGTGT****TATCAGAT****TGGC**  
caactttccggttgcatttccccctcgt**ATtGCATAATTATGTTTATCTT**t**GGA**agctgcgctcctgccagtgct  
cttgcggtttgggttagcttccctgcgatttt**GCT**c**GGA**acg**AGtGgCACGTGCTAATCGGGCGT**CGtctgcac**CGC**  
**CC**atgcaaccagccacccccctggtaagtgc**CA**cc**CCCGC**cta**ACAT**gt**CCGATAATTGAAATCGCTAAGC**tgaa  
caacggaatcgaaatggcttcattaatcaggtcacttcgatggcagcgcataatgttcttcaaaaattgaaatg  
ggggcggttgaaaagaggaaattgggtctatatagcacttagcgcgattgaaatgtctattttgtgttaccta  
tggggaaaagatgtttcggttattaatcatgagtgatacttactattgtattacaaaatgggtgcatatatacaga  
agatataatatttaatagatcttaaggagcatttgtatccattcaccaaaatatggtaaaaataaagcttaaat  
taaatttgcctcatttacct**TTAA**ggacatcc**TTTTgctTAATGAGTGC**a**CTCA**tgccacacccactcgcaac**CGA**  
**ATGAGTGT****CGCCCTG**c**GGACGCATAAAATTaAATAAAA**c**CT**Ca**CACACGTGGAGA**aagagaggtgatataac  
cttagagagagagagagagggagagct**CAGTCTGAGGCCaAGaAGTGTgCTAAATATTTAA**gt**ACTtAAAACA**  
**TAAACCTGAGTATTATATAAATT**ggc**tt**taacaagctcgtatgtgacaggtggttgggtgtgtctgctggg**CtGAC**  
**CCTTTTT**ttc**GG**gcacaagatctgctcgactcgattccat**TCAT**t**AGAAATGCTcACTAATGTGCCCCG**a**CTTAAT**  
**AATAATCAAATTTATATGCATGGTTATGTCCTT**t**Ag**agcagggaccacaaaactgaagtttcgagtggttcgaa  
tgggattggctgttaagtttacggagaaacctttgagaatgagacgaagataata**TGTCAATATCCTTG**ttttcc  
aaaatgtctgacaaaagtgcagatgtccagtatcgaaacacgcccagaccggtaccggttattctgctaccagt  
tttcttgtttgttttgtttgtttgtagccagcttgtttgtggcgcacactgagacccaaaaggccaaaaaggctcgc  
ccctcgggatttcccttagtctctgctgccagcttcttccctccacattctttttgggggtcc**GATGAG**a**TTG**a**AA**  
a**TTt**c**AC****ccgg****ATTAATTA**ggaatgctggcatccatggttgtgataggctagttcttttctagcctagcaacattt  
ttgatgtgactaaagagaatca**TCTTTaTGCCCA**caccgggaatactcattcttcaacaacaagcgacaataaa  
aacaattacaattgcaacaatggcagcggcagcaaaaacattttgagacattttccccacacacacacagacac  
acacatacttcagttaaatgaacatttgcaggacctagatatttatttattacaggggttgcactgcaggagcat  
taacccttactgccacggcagctctcgagcaacggaggactga**AAAAATTGAAATAAATTACCAAAACTAAAG**  
**CAACA**ACT**GTTTCG**CATA**ATGAAGTCAAATTATATTTgTgCCT**aagtgactgagagaaatttaataaacctatg  
atttacacgatcgattttccgatcttttgcacattttttgagtgaaactaggaaaccctttacaagcgagatcttg  
cagttcttttagtttctaagcattattctagtatttttaaataatatttccctttgttctggtcttaatttattata  
actaatgaatattttccgctctgtgtatttcggaaaagggggagttggaacatataaagatgggggtgcagaaaagat  
gatcagggaaaggtgtgagtggttcaaactagctgggctgtttggatagcga**AGGGTGcGTCC**tttgc**TGGTCTTT**c  
**gAATTATGCAAAAT**cg**tcTGCAC**ttcagatactactaccctacaaaaaaaaaaaaaacgaagagaaaacccccctaca

aacaaacgtATTAGtGTCATCgaGCATTtGCCaagCCATTtCaTtGACACgTagaacacacctttttcgtccacttc  
gtatGATGTTATCATTAAATTCtTGggGAATTAACACGGACATTGtCAaCcGTAAATGAGCTAAATTAATCTAgTA  
AATGTgTCGcagctcattccacaatcttctactacttgagagcggaggagtggggttcGCGggccTGTGGTTCTCC  
AGAGGATCCCCAatGcTGACACGCTTCTCCAGgTGgcccaggagtgggaaatggaaaatGGGCaGGgtttgcCCC  
tcggGGaGCTGCACtAAaACcCCAAATGAGATGCATGAATTCctcttcgcccagacagctcataaaagttaac  
atcgaagtatttacagcatatcttggggaaacttcaacttggaaatgattaaatgcaactacttgaaaacata  
caacttcaaatcaagtagtacaatctttaaatacaagtagatctcttgaatattgatttgcttaaccaactta  
agtttccttaacttctcttatttttggtaTTTTGGCTAACTatTTTTGGCCaAAatCgatcttggctcgcgc  
aaagttaatgaaccaaccgcaacttttCCAATCTCGCatttgatgcttgattccacaTATTTGGcCAGactgaa  
AAAtAATTTCaTGTTTTATGGCCaCgTTGTTTTCCACCgGcCACaAAAAATGCTTATCGAacgcccGAGATCgccaag  
cgagagaCTTGTAATATTTATGATTTTTtgcgatttttattogactgataaacgagtttttcccatcgcacagt  
tgcgAtGTGcgaaaatgttttggggaagaaatgtgacactagccatacagattcagattcacttctgtttgtt  
ggAATAAATAATCtGTAGAAAGGTtgtttgatTTTTagaagactccatccccctTTgTtTaTTCTtAtGTAACGA  
AACCTTtttctacacacatagctgcatagtaagttACCCTCAAGAGAAGCTTTAGGccgtgaatatTGGGTAAA  
TATTTAACTGGTTgCGATTGTTTTgGCAAAATCGTTGCAGTTGGtCAAACACGTGTTGAGATAATtAATTAA  
ATTTACTTGCTgGccTaaccCgTGCCACGTGCCACTcgagctccagtttgcctcgaatggAGTGGCAAAC  
ACTtGAGCACTTGCTttaaAAATGcGGCAAGTGCAttggggtgggtagtttagcttggttttggctggct  
ggtgaaaaTTCCtagGAATcGAAAACTTTGGTGGTCTtcggacgGCaGACAATGCAACaaTGTCatacgtactTG  
GATgaatcgcTGGCAtCgTcgcagTCCGtgGAGAatAgaccgAaATTCCcCGAAActcaccagcATGAtgtggC  
GATGATGACTtGtGgAAATCaAGCAatgatttccactccatCTGtAaCTAAATATGATTTATtTtCACGgtGTGt  
gttagccgctctCgCCcCtCTCATTAGtcggggcaccggggTAATTTGCATAAGGTCTGGCCCCAGGAaccAAA  
ggACaCACtcgagagcgcagctGGAAACTAATTAATAATGTTCCGCGcTCAAATTTCCtccGtCGccCtTATTTAT  
GaCCCTGTGAATGTCTtGCATATGGAcggagttgagatccTTCTcgttTTctTCCTTTggccGTTTACGAgTGAC  
AAATGggACATTTACATGCgagtcagttTGCATATtggAATTATTCATGGTTtCTttaaagatggcgcaggatgt  
gatgtcgcgggaaaaggatgaggggtttcctcaaggaagtccgaaatagaagtggtttcttttcatgctaccaata  
tgggggcacataaaaacttgcatttgatgagctaaatgtaaacatacactatttaatacattttttatgataagt  
gaacttaaagtcacactaacttttgaaaatgtgattgacttctacaatgtgtgttggtttaatttcttattttata  
tttttttaaatatcgaaaatctacaaatccgcttatgtttaaagtcgaagccgctggctaattgacaaaatgtgt  
aattgtggcagtagagtccttccgattgtcactctcccaacctccgtaatcccctaagtcaccataggggttg  
ggtaaaaatctaga

**Brown:** Cas TTTT > GGCC AAAA > CCGG Sites converted in total: 10

**col-Tv D Exd-CRM**

gcgccgctgatagaagtagggatatttctaacaagtagacaatataatagacatagtagtacttttttcagtaaaaat  
taccaatttttcacgcactacttaagccaatctaccaccttaattccgtttttttcttttgaacacatgaaaaa  
ATTCAATTccttaGATTTAATTAATCtaATtGaaAtCCacaAATTTGtTGCCATTTgTTgtgcagAAgTATTTT  
TGAATTTcGCACACGTTcgTGTGcAAAAatgtacaaatattgAATacGAAaaaagtcaaGGAaAAAatccattc  
tTTTTctCGCaaaAATgGTGACaGAGCaAAatgctgaccgcCGCCTACTaGGAAAAATAaTCCCAGcCGATTg  
aACGATTTATTATTTGGccCAGCCaactcggagcctgtcccgaataaccCGGAACCATTAccggTcCGAGTccaG  
ATCCaAGTCCgagtcgagtggtggacagggcggcattgcaattgggtggacatTTtGGagtgGAAgAAAcTTTTCG  
GGtACGTGGCAACGTGTTGAAATTACAAAATGTGTTAAAAaTGaaagagcagggcgggtaaaaagcAAAAATA  
ATATTTcattCACACACAGACTtttctctctctcgcgcgctccatataAAAAACATAAAATTTCTTTGAGAATAG  
AacttctgggatggagaggggggggggggCAAGGccggTATgTTTGACAGCCGACTtGGGAcacgaaGcac  
CGCCCcTTtttctcGCCaACAGGACATGGgtattAGaTCCTGgccaaagtgccaaaactggcctcactttcc  
GtCTGATTTAacggccaactattttgttttaatttttaccacttccctgctatcgacactcaacttaaacatata  
aaaccaactatttaaagagcaaaataaagttcaatttgatttctttggccttcgtaataattttctgcatctc  
tctgGGGAtcaGcgaAAAATATGAAttaTTgAAACAGCTGAAggaaatAATAtaaCCAAATcgggaaggccaaatc  
tgtttaagtgtttcagatatgttgggtgtgggttgaccaaatgacaatagcttttttagCtTcAACCTCCCTCAA  
gAAATccggTTTTCATggtttttctgttttttgcctaaaaatACAcAAAAagagtcgAaAAAatttgactgtgatt  
gtcacttgaatgtgtgggttgggaaAACCAcTCcAaATCCACTtcccaaatatgtcagtaTGGaaccgCGAacc  
tcGctccggTTCTCCAGccggTTTTTCGCAccggGccTGATGAGGATGTGCGcagagaacgttgctCaTGgagGCagT  
gCTAccggTAGTATCTTtccagccaggtcaaaagtgcgctgcccGCATGCCAAGTGGCCtcggcCaaATGAAACT  
TTAATGcgaacaaggacaaaaggctgaaagaaggctgctgatgaactacgtgatggtcagacaaattgaagtt  
acactggaaaataattagctaatttctagtttggcttaggttaagggattaagtaagaatgtgtttaaaggactc  
ttttataggttaactgttactctaaagaaaacttatccacagaatagatgtgctattttatcgcagtgatgtgg  
ataGtCAacGACAAAGTGaAATGcaTTGAGGttgggtggcgaacaaacgcgacctgaatcgcgaattggaatagcc  
agcctactccgccccctcaggatataatagctacttccgactagcatatgcgccagatagtagctggcgtatcaa  
tttcgataatgtacttggaccgcgaGtATCTTTATTaTCCTgacTGCTGtGCAATTATTccgactgcttactg  
tcgtaccgcttttccgagTCCTGGGAAAACGCAACAAaGGatATTTCCcGCACACGcCtccgacAccggTGCATC

CGggcaGGAAGCattTgcgtCGTGTcctttttGCATCCtTACATcgtcgCTtCCTTCCtgccgatcagaaccctg  
gctgctttTTCATCCGCAATTTTTCACGCCACTTTGTTccggGATGACAAATCTCGTTGCGTGTtccggGATTGGC  
caactttccggttgctattccccctcgtATtGCATAATTATGTTTATCTTtGGAagctgcgctcctgccacgtgct  
cttgcgttttgggttagcttccctgcgattttGCTcGGAacgAGtGgCACGTGCTAATCGGCCGTCTctgcacCGC  
CCatgcaaccagccacccccctggtaagtgcAACCCCGCctaACAtgtCCGATAATTGAAATCGCTAAGCtgaa  
caacggaatcgaaatggcttcattaatcagggtcaacttcgatggcagcgcataatgttcttcaaaaattgaaatg  
ggggcggttgaaaagaggaaattgggtctatatagcacttagcgcgattgaatttgctcattttgtgttaccta  
tggggaaaagatgtttcgggttattaatcatgagtgatacttactattgtattacaaaatgggtgcataatcaga  
agatatatattattaatagatcttaaggagcattttgtatccattcaccaaaatggtaaaaataaagcttaaat  
taaatttgctcatttaccctTTAAaggacatcctttgctTAATGAGTGCaCTCAtgcccaccccactgcacCGA  
ATGAGTGTCCCTGcGGACGCATAAATTATaAATAAAAgCCtCaCACACGTGGAGAaagagaggtgtatataac  
cttagagagagagagagaggggagagctaCAGTCTGAGGCCaAGaAGTGTgCTAAATATTTAAgtACTtAAAACCA  
TAAACCTGAGTATTTATAAATTggctttaacaagctcgtatgtgacggtgggtgggtgtgtgtctgtgggCtGAC  
CCTTTTTtccGGgcacaaggatctgctcgaactcgattccatTCATtAGAAATGCtACTAATGTGCCGCaCTTAAT  
AATAccggAATTTATATGCATGGTTATGTCCTTtAgagcaggaccacaaaactgaagtttcgagtgattgcgaa  
tgggattggctgttaagtttacggagaaaacctttgagaatgagacgaagataataTGTCaATATCCTTGttttcc  
aaaatgtctgacaaaagtgcagatgtccagtatcgaaacacgcccagaccggtaccggttattctgctaccagt  
tttcttggtttgtttttgtttgttagccagcttgtttgtggccgacactgagaccaaaaggccaaaagggtcgc  
ccctcgggatttcccttagtccctgctgccagcttcttccctccacattctttttgggggtccGATGAGatTTGaAA  
aTttcACAAAATTAATTAaggaatgctggcatccatggtgtgataggttagttcttttctagcctagcaacattt  
ttgatgtgactaaagagaatcaTCTTTtTGGCCAaccccgggaatactcattcttcaacaacaagcgcacaataaa  
aacaattacaattgcaacaatggcagcggcagcaaaaacatttgagacattttccccacacacacacagacac  
acacatacttcagttaaatgaacattttgcaggacctagatatttatttattacaggggttgactgcaggagcat  
taacccttactgccacggcagctctcgagcaacggaggactgaAAAAATTGAAATAAATTACCAAACTAAAGG  
CAACAACCTGTTCCGATAATGAAGTCAAATTATATTTgTgCCTaagtgcactgagagaaatttaataacctatg  
atttacacgatcagttttcgcacttttgcacatttttgagtgaaactaggaaaccctttacaagcgagatcttg  
cagttctttagtttctaagcattattctagatattttaaataatatttcttcttctgttcttaatttattata  
actaatgaatattttccgctctgtgtattcggaaaagggggagttggaacatataaagatgggggtcagaaaagat  
gatcagggaaaggtgtgagtggttcaaacctagctggggcgtttggatagcgaAGGGTGcGTCCtttgcTGGTCTTc  
gAATTATGCAATcgtcTGCACttcagatactactaccctacaaaaaaaaaaaaacgaagagaaaaccccctaca  
aacaacgtATTAGtGTCatCgaGCATTtGCCaagCCATTtCaTtGACACgTagaacacctttttcgtccacttc  
gtatGATGTTccggTTTAATTCtTGggGAATTAACACGGACATTGtCAaCcGTAATGAGCTAATTAATCTAgTA  
AATGTgTCGcagctcattccacaatttctcactacttgagagcggaggagtggttcGCGTTTTTGTGGTTCTCC  
AGAGGATCCCCAatGcTGACACGCTTCTCCAGgTGccgaggagtgggaaatggaaaatGGGCaGGtttgccc  
tcggGGaGCTGCACtAaAACcCCAATGAGATGCATGAATTCctcttcgcccagaagcagctcataaaagttaac  
atcgaagtatttacagcatattttggggaaacttcaacttggaaatttgattaaatgcaaacactacttgaaaacata  
caacttcaaatcaagtatgtacaattttaaatacaagtagatctctttgaatttattgatttgcttaaccaactta  
agtttcccttaacttctcttattttttgtgtaTTTTGGCTAACTatTTTTGGCCAaAAatCgatctttggtcgcgcc  
aaagttaatgaaccaaccgcacttttCCAATCTCGCAatttgatgcggttgattccacaTATTTGGcCAGactgaa  
AAaAATTTcATGTTTATGGCcaCGTTGTTTTACCgGcCACaAAAATGCTTATCGAacgcccGAGATCgccaag  
cgagagaCTTGTAATATTTAaccggTTTTttgcgatttttattcgaactgataaacgagtttttcccatcgcacagt  
tgcgAtGTGcgaaaaatgtttgtgggaagaaattgtgcacctagcccatacagattcgattcacttctgtttgtt  
ggAATAAATAATCtGAGAAAGGTtgttgatTTTTagaagactccatccccctTTgTtATCTtAtGTAACGA  
AACCTtttctacacacatagctgcatagtaagttACCCTCAAGAGAACGTTTAGGccggtgaatattTGGGTAAA  
TATTTAAACTGGTTgCGATTGTTTTgCAAAAATCGTTGCAGTTGGtCAAACACGTTTGGAGATAATtAATTAA  
ATTTACTTGgCTTTTTTTTaaccCgTGCCACGTGCCACTcgagtcocagtttgcctcgcctcgaatggAGTGGCAAAC  
ACTtGAGCACTTGCTttaaaAAATGcGGCAAGTGCAttggggtgggtgggtgagtttagcttgggttttggctggct  
ggtgaaaaTTCctagGAAtcGAAAACTTTGGTGGTCTtcggacgGCaGACAATGCAACaaTGTCatacgtactTG  
GATgaatcgcTGGCAtCtGTCgagTCCGtgGAGaAtAgaccgAaATTCCcCGAAactcagagcATGAtgtggC  
GATGATGACTtGtGAAATCaGCAatgatttccactccatCTGtAaCTAAATAccggTTATtTtCACGgtGTGt  
gtttagccgctctCgCCcCtCTCATTAGtcggggcaccggggTAATTTGCATAAGGTCTTGCCCCAGGAaccAAA  
ggACaCACtcgagagcgcagctGGAAACTAATTAATAATGTTCCGCGcTCAAATTTCCttcgCtCGccCtTATTTAT  
GaCCCTGTGAATGTCTtGCATATGGAcggagttgagatccTTCTcgttTTctTCCTTTTTTTGTTTACGAgtGAC  
AAATGggACATTTACATGCgagtcagttTGcATATtggAATTATTCATGGTTtCTttaaagatggcgcaggatgt  
gatgtcgcgggaaaaggatgaggggtttcctcaaggaagtgcgaaatagaagtggtttcttttcatgctaccaata  
tgggggacataaaaacttgcatttgatgagctaaatgtaaacatacactattttaaatacatttttatgataagt  
gaacttaaagtcacactaaccttttgaatattgattgactctacaatgtgtgtttgtaatttcttattttata  
tttttttaaatatcgaaaatctacaaatccgcttatgtttaaaagtcaagccgctggctaatgacaaaatgtgt  
aattgtggcgatgagagtccttccgattgtcactctcccaaccctccgtaatcccctaagtcacataggggttg  
gtaaaaatctaga





AATGTgTCGcagctcattccacaatctctactacttgagagcgcaggagtgggttcCGGTTTTTGTGGTTCTCC  
AGAGGATCCCCAatGcTGACACGCTTCTCCAGgTGcgcaggagtgggaaatggaaaatGGGCaGGgtttgcCCC  
tcggGGaGCTGCACtAaAACcCCAATGAGATGCatGAATTCctcttcgcccagacagctcataaaagttaac  
atcgaagtatttacagcatatTTTTGGGaaacttcaacttggaaatgattaaatgcaaactacttgaaaacata  
caacttcaaatcaagtatgtacaatTTTTaaatcaagtagatctctttgaaatattgatttgcttaaccaactta  
agtttccttaacttctcttatttttggtaTTTTGGCTAACTatTTTTGGCCAaAAatCgatctttggtcgcgcc  
aaagttaatgaaccaaccgcacttttCCAATCTCGCAtttgatgctggttgattccacaTATTTGGcCAGactgaa  
AAAtAATTTCaTGTtTATGGcAcGTTGTTTTcACCgGcCACAAAAatGCTTATCGAacgcccGAGATCgccaag  
cgagagaCTTGTAAATTTTTATGATTTTTtggcgatTTTTattcgcactgataaacgagttttccatcgcacagt  
tgcgAtGTGcgaaaatgttttggggaagaattgtgcacctagcccatacagattccactctgtttgtt  
ggAATAAATAATCtGtAGAAAGGTtgttgtatTTTTagaagactccatccccctTTgTTaTTCTtAtGTAAACGA  
AACCTTTTTctacacacatagctgcatagtaagttACCCTCAatGAGAACGTTTAGGccgtgaatatTGGGTAAA  
TATTTAAACTGGTTgCGATTGTTTTgGCAAAATCGTTGCAGTTGGtCAAACACGTGTTTGGAGAgcccTtAagggA  
ATTTACTTgCtTTTTTaaaccGtGGCACGTGCCACTcgagtcagtttggctgcctcgaaatggAGTGGCAAAC  
ACTtGAGCACTTGTttaaAAATGcGGCAAGTGCAtttgggttgggtgggtagtttagcttggTTTTggctggct  
ggtgaaaaTTCctagGAATcGAAAACTTTGGTGGTCTtcggacgGCaGACAATGCAACaaTGTcAtacgtactTG  
GATgaatcgcTGGCAtCtGTCgcagTCCGtgGAGAatAgaccgAAATTCCcCCGAActcagagcATGAtgtggC  
GATGATGACTtGtGAAATCaAGCAatgatttccactccatCTGtAaCTAAATATGATTTATtTtCACGgtGTGt  
gtagccgctctCgCCcCtCTCATTAGtcggggcaccggggTAATTTGCATAAGGTCTTGGCCCCAGGAaccAAA  
ggACaCACtcgagagcgcagctGGAAACTaagggAAATGTTCCGCGcTCAAATTTCCtccgCtCGccCtTATTTAT  
GaCCCTGTGAATGTCTtGCATATGGAcggagttgagatccTTCTcgttTTctTCCTTTTTTGTTTACGAgtGAC  
AAATGggACATTTACATGcagtcagttTTCATATtggAagggTTTCATGGTTtCTttaaagatggcgcaggatgt  
gatgtcgcgggaaaaggatgaggggtttcctcaaggaaagtcggaaatagaagtgggtttcttttcatgctaccaata  
tgggggacataaaaacttgcatttgatgagctaaatgtaaacatacactatTTaaatacatTTTTtatgataagt  
gaacttaaagtcacactaactTTTTgaaaatttgattgacttctacaatgtgtggtttaaatttcttattttata  
TTTTTTaaatatcgaaaatctacaaatccgcttatgtttaaagtcgaagccgctggctaattgacaaaatgtgt  
aattgtggcgatgagagtccttccgattgtcactctcccaacctccgtaatcccctaagtcaccataggggttg  
gtaaaaatctaga

Red: HOX: ATTA > CGGC, TAAT > GCCG  
Sites converted in total: 18

col-Tv D Hth-CRM

gcgccgctgatagaagtagggatatttctaacaagtagacaatataatagacatagtacttttttcagtaaaatat  
taccaatTTTTcagcactacttaagccaatctaccaccttaattccgTTTTTTTTcttttgaacacatgaaaa  
ATTCAATTccttaGATTTATATTAATCtaATtgAaAtCCacaAATTTGtTGCCATTTgTTgtgcagAAgTATTTT  
TGAATTTcGCACACGTTcgTTGcCAAAAAatgtacaaatattgAATacGAAaAAgtcaaGGAaAAAatccattc  
TTTTctCGCaaaAATgGTGACaGAGCaAAatgctgaccgcCGCCTACTaGGAAAAATAaTCCCCAGcCGATTtg  
aACGATTTATTATTTGGccCAGCCaactcggagcctgtcccggaaataccCGGAACCATTAATCATcCGAGTccaG  
ATCCaAGTCCgagtcgcagtggtggacagggcggcattgcaattgggtggacatTTtGGagtGAAgAAAcTTTTGC  
GGtACGgataAACGTGTTGAAATTACAAAATGTGTTAAAAaTGaaagagcagggcgggtaaaaaagcAAAAATA  
ATATTTcattCACACACAGACttttgtctctgctccgcgctccatataAAAAACATAAATTTCTTTGAGAATAG  
AactctgggatggagaggggggggggggggCAAGGTGATTATgTTcaggAGCCGACTtGGGAcacgaaGcac  
CGCCCcTTTTctcGCCaaACAGGACATGGtattAGaTCTTGgccaagtgcacaaactggcctcactttcc  
GtCTGATTTAcggccaactattttgtttaaattttaccacttccctgctatcgcactcaactcaaaacatata  
aaaccaactatttaaagagcaataaagttcaatttgattttctttggccttcgtaataattttcctgcatctc  
tctgGGGAtcaGcgaAAAATATGAattaTTgAAACAGCTGAAggaaatAATAaaCCAATcgggaaggccaaatc  
tgtttaatgtttcagatatgttgggtggtgggttgaccaaatgacaatagcttttttagCtTcAACCTCCCTCAA  
gAAATTGATTTTCAtggtttttctgttttttgcctaaaaatACAaAAAAagagtcgAaAAAatttgactgtgatt  
gtcacttgaatgtgtgggttgggaaAACCAcTcAaATCCACTtcaccaaatatgtcagtaTGGaATCACGAacc  
tcGctTGATTTCTCCAGTGATTTTTCGCAATCAGccTGATGAGGATGTGCcgagaacggttgcTcTGgagGCagT  
gCTATGATTAGTATCCTttcagccaggtcaaaagtgcgctgcccGCATGCCAAGTGGCCctggcCaaATGAAACT  
TTAATGcgaacaaggacaaaaggctgaaagaaggctgctgatgaactacgtgatggtcagacaaattgaagtt  
acactggaaaataaattagctaatttccctagtttgccttaggttaagggattaagtaagaatgtgtttaaaggactc  
ttttataggttaacttgttactctaaagaaaacttatccacagaatagatgtgctatTTtatcgcagtgatgtgg  
ataGtCaacGACAAAGTGAATGcaTTGAGGttgggtggcgaacaaacgcgacctgaatcgcgaattggaatagcc  
agcctactccgccccctcaggatataatagctacttgcactagcatatgcgccagatagtagctggcgtatcaa  
tttcgataatgtacttggaccgcgaGtATCTTTATTaTCCTgacTGCTGtGCAATTATTtccgactgctttactg  
tcgtaccgcttttccgagTCCTGGGAAAcGCAACAAaGGatATTTGCcGCACACGcCtccgacATGATTCATC  
CGggcaGGAAGCattGcgtCGTGTcctttttGCATCCTTACATcgtcgCTtCCTTCCtgcgatcagaaccctg  
gctgcttTTCATCCGCAATTTTACGCCCACCTTTGTTTGTGAGcaggAAATCTCGTTGCGTGTATCAGATTTGGC

caactttccggttgctattccccctcgt**AT**GCATAATTATGTTTATCTTT**GGA**agctgcgctcctgcccagtgct  
cttgcgtttgggttagcttcctgcgatttt**GCT**c**GGA**acg**AG**T**G**CACGTGCTAATCGGGCGGT**CG**tctgcac**CGC**  
**CC**atgcaaccagccacccccctggtaagtgc**CCCCGC**cta**ACA**tgt**CCGATAATTGAAATCGCTAAGC**tgaa  
caacggaatcgaaatggcttcattaatcaggtcacttcgatggcagcgcataatgttcttcaaaaattgaaattg  
ggggcggttgaaaagaggaaattgggtctatatagcacttagcgcgattgaatttgctcattttgtgttaccta  
tggggaaaagatgttccggttattaatcatgagtgatacttactattgtattacaaaatgggtgcataatcaga  
agatataatattaatagatcttaaggagcatttgtatccattcaccaaaatattgtaaaaaataaagcttaaat  
taaatttgctcatttacct**TAA**aggacatcctttgct**TAATGAGTGC**a**CTCA**tgccacaccactcgcaac**CGA**  
**ATGAGTGTGCGCCTG**c**GGACGCATAAATTAT**a**AATAAAA**g**CC**tCa**CACACGTGGAGA**aagagaggtgatataac  
cttagagagagagagagagggagagct**CAGTCTGAGGCC**a**AG**a**AGTGT**g**CTAAATATTTAA**gt**ACT**t**AAAACCA**  
**TAAACCTGAGTATTTATAAATT**ggctttaacaagctcgatgtgacggtgggtgggtggtgctggtggg**C**t**GAC**  
**CCTTTTT**ttc**GG**gcacaaggatctgctcgactcgattccat**TCAT**t**AGAAATGC**tc**ACTAATGTGCCG**a**CTTAAT**  
**AATAATCAAATTTATATGCATGGTTATGTCCTT**t**Ag**agcaggaccacaaaactgaagtttcgagtggttgcgaa  
tgggattggctgttaagtttacggagaaaacctttgagaatgagacgaagataata**Tccgg****ATATCCTTG**ttttcc  
aaaatgtctgacaaaagtgcagatgtccagtatcgaaacacgcccagaccggtaccgttattctgctaccagt  
tttcttgtttggtttggttgtagccagcttggttggtggccgacactgagaccaaaaaggccaaaaggctcgc  
ccctcgggatttcccttagtctgctgccagcttcttccctccacattcttttgggggtcc**GATGAG**at**TTG**a**AA**  
a**TT**tc**ACAAAAATTAATTA**ggaatgctggcatccatggtgtgataggttagttcttttctagcctagcaacattt  
ttgatgtgactaaagagaatca**TCTTT**a**TGGCCA**caccocggaatactcattcttcaacaacaagcgcacaataaa  
aacaattacaattgcaacaatggcagcggcagcaaaacatttgagacattttccccacacacacacagacac  
acacatacttcagttaaatgaacatttgcaggacctagatatttatttattacaggggttgccactgcaggagcat  
taacccttactgccacggcagctctcgagcaacggaggactga**AAAAATGAAATAAAT****TACCAAAACTAAAG**  
**CAACA**ACT**GTTTCGCATAATGAAGTCAAATTATATTT**g**T**g**CCT**aagtgcactgagagaaatttaataaacctatg  
atttacacgatcgattttcgatctttgcaacattttttgagtgaaactaggaaaccctttacaagcgcagatcttg  
cagttcttttagtttctaagcattattctagtttttaaaatataattttcctttgttctggtcttaatttattata  
actaatgaatattttcgtctgtgtatttcggaaaaggggaggttggaaacataaaagatggggtgcagaaagat  
gatcagggaggtgtgagtggttcaactagctgggcttggatagcga**AGGGTG**c**GTCC**tttgc**TGGTCTT**c  
g**AATTATGCAAAT**cgct**TGCAC**ttcagatactactaccctacaaaaaaacgaagagaaaacccccctaca  
aacaacgt**ATTAGTGC**at**C**ga**GCATT**t**GCC**aag**CCATT**tCa**T**t**GACAC**gTagaacaccttttctgctccacttc  
gtat**GATGTTATCATT****AATTC**t**TG**gg**GAATTAACACGGACATT**g**CA**a**C**g**TAAATGAGCTAATTAATCTA**g**TA**  
**AATGT**g**TGC**cagctcattccacaatttctctactacttgagagcagaggagtggttc**CGGTTTTTGTGGTTCTCC**  
**AGAGGATCCCCA**at**G**c**cagg****ACGCTTCTCCAG**g**TG**gcccagaggagtggaatggaaaat**GGG**Ca**GG**tttgc**CCC**  
tcgg**GG**a**GCTGCAC**t**AaAAC**c**CCAATGAGATGC**at**GAATTC**ctcttcgcccagacagctcataaaagttaac  
atcgaagtatttacagcatattttggggaaacttcaacttggaaatttgattaaatgcaactacttgaaaacata  
caacttcaaatcaagtatgtacaattttaaactcaagtagatctctttgaatttattgatttgcttaaccaactta  
agtttcccttaacttctcttatttttgggtgta**TTTTGGCTAACT**at**TTTTGGCC**a**AA**at**C**gatctttggctcgcgcc  
aaagttaatgaaccaaccgactttt**CCAATCTCGC**atttgatgcggttgattccaca**TATTTGG**c**CAG**actgaa  
**AA**a**AATTT**Ca**TGTTTTATGG**c**A**c**GTTGTTTTACC**g**G**c**CAC**a**AAAA**g**GCTTATCGA**acgccc**GAGATC**gccaag  
cgagaga**CTTGTA**AAAT**ATTTATGATTTTT**ttgcgatttttatttcgactgataaacgagtttttcccatcgcacagt  
tgcg**ATGT**cgaaaatgttttggggaagaaattgtgcacctagcccatacgattcagattcaccttctgtttgtt  
gg**AATAA****AAATC**t**G**t**AGAA**g**GGT**gttgtat**TTTT**agaagactccatccccct**TT**g**TT**a**TTCT**t**A**t**GTAACGA**  
**AAC**TTTTtctacacacatagctgcataagtaagt**ACCCTCAT****GAGA**AC**GTTTAGG**ccgtgaatat**TGGGTAA**  
**TATTTAAACTGGTT**g**CGATGTTTTG****GCAAAATCGTTG**C**ACTTGGT****CAAACACGTTT****GAGATAAT**t**AATTA**  
**ATTTACTTG**g**CTTTTT**taacc**CgTGCCACGTGCC**actcgagtcagtttctgctgcctcgaatgg**AGgata****AAAC**  
**ACT**t**GAGCACTT****GCT**tttaa**AA**t**G**c**GGCAAGTGC**atttgggttgggtgggttagtttagcttggtttggctggct  
gggtgaaa**TT**Ctag**GAA**tc**GAAA**ACT**TTGGTGGTCT**tcggacg**GC**a**GACAATGCAAC**aa**TGTC**atacgtact**TG**  
**GAT**gaaatcgc**TGGCATC**t**GTC**gcag**TCCG**t**GAGA**at**Ag**accc**AaATTCC**c**CCGAA**ctcacgagc**ATGA**tgtgg**C**  
**GATGATGACT**t**G**g**AAATC**aa**GCA**atgatttccactccat**CTG**t**A**a**CTAAATATGATTTAT**t**T**c**CACG**gt**GTG**t  
gttagccgctct**C**g**CC**c**CTCATTAG**tccggggcaccgggg**TAATTTGCATAAGGTCTGGCCCCAGGA**acc**AAA**  
gg**AC**a**CAC**tcgagagcgcagct**GGA**a**ACTAATTA**AAAT**GTTTCGCGC**c**TCAAATTTCC**ttcg**C**t**CG**cc**C**t**TATTTAT**  
**GaCCCTGTGAATGTCT**t**GCATATGGA**cggagttgagatcc**TTCT**cgtt**TT**ct**TCCTTTTTTTGTTTACGA**g**cagg**  
**AAATG**gg**ACATTTACATGC**gagtcagtt**TGCATAT**tgg**AATTATTCATGGTT**t**CT**ttaaagatggcgcaggatgt  
gatgtcgcgggaaaaggatgaggggttccctcaaggaagtgcgaaatagaagtggtttcttttcatgctaccaata  
tgggggacataaaaacttgcatttgatgagctaaatgtaaacatacactattttaaatacattttttatgataagt  
gaacttaaagtacactaacttttgaaaatttgattgacttctacaatgtgtgttggtttaatttcttattttata  
tttttttaaatatcgaaaatctacaaatccgcttatgtttaaagtcgaagccgctggctaattgacaaaatgtgt  
aattgtggcgatgagagtccttccgattgtcactctcccaaccctccgtaatcccctaagtcccataggggttg  
ggtaaaaatctaga

Purple: Hth: TGGC -> GATA; TGAC -> CAGG; GTCA -> CCGG  
Sites converted in total: 7

**apS2-CRM fragment**

CCCGctgccaAAACAACCCTaAGGCGATTATCTCAAGTGCTcGCCcttccaggactatGtTTGCCTccgtgcacc  
ctgCTGtAGATGCTTATCGATTACACGGtGaGCGATGAAATCATTACTCCGAATTAATAAACGTCATACTCGCT  
TtTCGTCAActtGtATTTGAtgTCTCAATgagcgcgagcgtgccattggcaagggaaaccCATTTCATcgcaGATTT  
agaccctggcactgtgatagtggtgtaaacacgtcgcAATTAGTTGaCctaAaCGAaTgCCCCggcgtaaccgtcgt  
cttccgggtcagagtcgccggaATGAcATCAagCTCCGAttagTcACTTTCTAGTtGgTTGGGAGcCaAGCAGCTGc  
CtgccatCCgCaACTCtCGCTcttattgtttgtcccatATcTGTATTTGTcGcaCaACTTTGTTGTGATTACGG  
CGATAAAGCGgcTCaAGTAAATCACAATAAacgacgggtctaGTCTGgCCGActcGgTtCgAAAGAAAGTGTGAA  
TAagaccgggctcaacaatcaacaacaatggattccgcggaccggaccagcaatgacaaatgtctctaggttat  
gagtggtgCATGtgCATAAAAGTcATAAGCaATAGAAaAATAATtGTGttCaCGTCATGGGCaCACGTCAacaaaa  
actgccgAGaAgCAATTGcgcGACACTTTCTTGgGTgTAAATTAAGaTACTTTaTAGCTGGGgtggtgccgtggt  
cgCTTCCGcTgGCTACTGGTTTTgaaccagGGCCacgAAACCAGTTCAGCTcAggccccttggtgaagtccaag  
ctggtggccagcttgggtttttgtgtatcactcgattgtaTTTTGcTCTTTGCATGCGTCAGCGatataatata  
ttgaaccgctagcatattcattgattttcgaacagtaattctgcaatATCAATGcctgtTCAAcTTCGTGGGACt  
AGCACAaccatctcttgcctccccgcaccgtcccgcgaagaaatgccgtcacgtacgcgagccccatcgttcaa  
caaataaagaatgaaccggatcCTCGgAAAggcgtggCATCGTAATGAtAcTGATGCGTTAGTAAATTCGggtC  
AAATTATAGGAGgccagctctaaAATCGAgcgACCTtttgaaggtaGGCAGGAAATGCGAAATTCGGTAGCCtGT  
TTATTAATACgAAAaTATatgaatccattgcccgtTgGCAGGACctaagttgtggggcattttagccgagatc  
agaacGGtCaGCTACCTGTGGATGGGTCCCgAaATCACAcGAAATAGtCtaAGCtATAAATTAGATttTTATCtc  
gttgccgcaggaataaaaggaggcaagcctcctactgacgctcgatctctggagagcTGTCgCATaTtGGGGCGA  
TCCAATTAAGTGGTAATTTTTAtCATTTTAgCGTCGagGGCCgggttagttctggtgggtcgcttttactccgaa  
atATTTGCTGACAAACGGAAGCGATATgTTGAaATTaTTCaGCGTAAggAtTCCaTGaaccTTCggcagagcCTG  
GGAGTGaAttcagagctggaatttgaatcgattcgaggggggtacaccgccttcgatgaaacgattttttgtcg  
ggccttgccttgattgactttactcaagattgacttcatgaaggcaatttagaattgggctgataatcagtcgggt  
acataagtcgcTtTaTTTGCcTTGATTATATGCACagtggtgcattgcacACTACGgAaGCTgcaactatgactgag  
ggggtcataAAGCGTAGGTGAGagggTcTTGTTcgcggggtaacttgatTTGTTTGTCTaTTTgTTCGcctccga  
ctctttgctttcgcactcctttacagggaggacaagtattaatgtaaaatggtaactggtcatctgagggcgtcat  
ttgggtctggctcgggg

**apSJ2 WT fragment**

GGATCCCTAGGTTAGTAGAATTCGCCCTTatgtgTTTTGGTTccagggtccggtgggaaccagcttcaaatgaag  
ttatcacagcgattatattccttaaaacggttcagaaacctccgcccgtgcaatttgaacagctttctgggggtggg  
agtttaattttgaggggtttgtgtataaaaggccaAACAACCCTAATTGAAATTATGCGGTGTGgCTCtGCAGCGA  
cTGCTCGTTTTaGGCtgTGGTATTCCGAAGGGAGTACTaaAGGATTTcAtCGGGCgGgttCGGAACCTTTTTCGGC  
GGAActGATTAGCAGACAATATGTCAAAGCTtgccaCtGGGAGGGTGAActCTGTAGCTTCACCCtTcaagcggC  
gtTGcGACTactccAGGGACagCtacTCGAGGcTCGGctGATAAGGGaAAAAGTCATGACAAATAAACGGATACA  
TGTGTGGCAATAGTTTTGCTtATTGCCGCGATAATAATCGACgtGaACAACAATGGtCTTTGTCCtGGTcaTGC  
TCCTGCTGCcTGGGTGCCCaTaAAGaACAaTCGCGAGCGCGGCCAACgAgAATTACAGGATCGTTTTatggc  
aaccgcctggttagCAGTCTCCTGGTAGCACCCGctgccAAACAACCCTaAGGCGATTATCTCAAGTGCTcGCCc  
ttccaggactatGtTTGCCTccgtgcaccctgCTGtAGATGCTTATCGATTACACGGtGaGCGATGAAATCATTA  
CTCCGAATTAATAAACGTCATACTCGCTTtTCGTCAActtGtaTTTGAAtgTCTCAATgagcgcgagcgtgccattg  
gcaagggaaaccCATTTCATCgcaGATTTAgaccctggcactggtgatagtggtgtaaacacgtcgcAATTAGTTGA  
CctaAaCGAaTgCCCCggcgtaccgtcgtcttccggtcagagtcgccggaATGAcATCAAgCTCCGAttagTcACT  
TTCTAGTtGgTTGGGAGcCaAGCAGCTGcTgccaCCgCaACTCtCGCTcttattgtttgtcccatATcTGTA  
TTTGTcGcaCaACTTTGTTGTGATTACGGCGATAAAGCGgctCaAGTAAATCACAATAAacgacgggtctaGTCT  
GgCCGActcGgTtCgAAAGAAAGTGTGAATAgagcggggtcaacaatcaacaacaatggattccgcggaccgga  
ccagcaatgacaaatgtctctaggttatgagtggtgAAGGGCGAATTCTAACCTATTCTAGA

**apJ2-D-Col**

GGATCCCTAGGTTAGTAGAATTCGCCCTTatgtgTTTTGGTTccagggtccggtgggaaccagcttcaaatgaag  
ttatcacagcgattatattccttaaaacggttcagaaacctccgcccgtgcaatttgaacagctttctgggggtggg  
agtttaattttgaggggtttgtgtataaaaggccaAACAACCCTAATTGAAATTATGCGGTGTGgCTCtGCAGCGA  
cTGCTCGTTTTaGGCtgTGGTGCCTTACCTATCAGACTaaAGGATTTcAtCGGGCgGgttCGGAACCTTTTTCGGC  
GGAActGATTAGCAGACAATATGTCAAAGCTtgccaCtGGGAGGGTGAActCTGTAGCTTCACCCtTcaagcggC  
gtTGcGACTactccAGGGACagCtacTCGAGGcTCGGctGATAAGGGaAAAAGTCATGACAAATAAACGGATACA  
TGTGTGGCAATAGTTTTGCTtATTGCCGCGATAATAATCGACgtGaACAACAATGGtCTTTGTCCtGGTcaTGC  
TCCTGCTGCcTGGGTGCCCaTaAAGaACAaTCGCGAGCGCGGCCAACgAgAATTACAGGATCGTTTTatggc  
aaccgcctggttagCAGTCTCCTGGTAGCACCCGctgccAAACAACCCTaAGGCGATTATCTCAAGTGCTcGCCc  
ttccaggactatGtTTGCCTccgtgcaccctgCTGtAGATGCTTATCGATTACACGGtGaGCGATGAAATCATTA  
cTCCGAATTAATAAACGTCATACTCGCTTtTCGTCAActtGtaTTTGAAtgTCTCAATgagcgcgagcgtgccattg  
gcaagggaaaccCATTTCATCgcaGATTTAgaccctggcactggtgatagtggtgtaaacacgtcgcAATTAGTTGA  
CctaAaCGAaTgCCCCggcgtaccgtcgtcttccggtcagagtcgccggaATGAcATCAAgCTCCGAttagTcACT  
TTCTAGTtGgTTGGGAGcCaAGCAGCTGcTgccaCCgCaACTCtCGCTcttattgtttgtcccatATcTGTA  
TTTGTcGcaCaACTTTGTTGTGATTACGGCGATAAAGCGgctCaAGTAAATCACAATAAacgacgggtctaGTCT  
GgCCGActcGgTtCgAAAGAAAGTGTGAATAgagcggggtcaacaatcaacaacaatggattccgcggaccgga  
ccagcaatgacaaatgtctctaggttatgagtggtgAAGGGCGAATTCTAACCTATTCTAGA

CTCCGAATTAATAAACGTCATACTCGCTTTTCGTCAActtGtaTTTGAatgTCTCAATgagcgcgctgcccattg  
gcaaggggaaccCATTTCATcgcaGATTTtagaccctggcactgtgatagtggtgtaaacacgctcgcAATTAGTTG  
CctaAaCGAaTgCCCCggcgtagcgtcgtcttccggtcagagtcocggaATGAcATCAagCTCCGAatagTcACT  
TTCTAGTtGgTTGGGAGcCaAGCAGCTGcCtgccatCCgCaACTcCGCTcttattgtttgtccccatATcTGTA  
TTTGTcGcaCaACTTTGTTGTGATTACGGCGATAAAGCGgcTCaAGTAAATCACAATAatagcagcgtcctaGTCt  
GgCCGActcGgTtCgAAAGAAAGTGTGAATAgagccggggtcaacaatcaacaacaatggattcgcgggaccgga  
ccagcaatgacaaatgtctcttaggcttatgagtgggAAGGGCGAATTcTAACCTATTCTAGA

**apJ2-D-Antp**

GGATCCCTAGGTTAGTAGAATTCGCCCTTatgtgttttggttccaggtccggttgggaaccagcttcaaatgaag  
ttatcacagcgattatattccttaaaacggttcagaaacctccgcccgtgcaatttgaacagctttctgggggtggg  
agttaattttgaggggtttgtgtataaaaggccaAAACAACCgcccTGAAcggcTGCGGTGTGgCTCtGCAGCGA  
cTGCTCGTTTTAGGCTgTGGTATTCCGAAGGGAGTACTaaAGGATTTcAtCGGGCgGgttGCGAACCTTTTTGCGGc  
GGAActGATTAGCAGACAATATGTCAAAGCTtgccaCtGGGAGGGTGAActCTGTAGCTTCACCCtTcaagcggC  
gtTGcGACTactccAGGGACagCtactTCGAGGcTCGGctGATAAGGGaAAAAGTCATGACAAATAAACGGATA  
TGTGTCCGCAATAGTTTTGCTtATTGCCGCGATAATAATCGACgtGaACAACAATGGtCTTTGTCCtGGTcaTGC  
TCCTGCTGCcTGGGTGCCCaCaTaAAGaACAaTCGCGAGCGCGCGCCCAACgAgAeggcCAGGATCGTTTTatggc  
aacgcctggttagCAGTCTCCTGGTAGCACCCGctgccaAAACAACCCTaAGGCGATTATCTCAAGTGCTcGCCc  
ttccaggactatGtTTGCCTccgtgcaccctgCTGTAGATGCTTATCGATTACACGGtGaGCGATGAAATCATTA  
CTCCGAcggcAATAAACGTCATACTCGCTTTTCGTCAActtGtaTTTGAatgTCTCAATgagcgcgctgcccattg  
gcaaggggaaccCATTTCATcgcaGATTTtagaccctggcactgtgatagtggtgtaaacacgctcgcAeggcGTTG  
CctaAaCGAaTgCCCCggcgtagcgtcgtcttccggtcagagtcocggaATGAcATCAagCTCCGAatagTcACT  
TTCTAGTtGgTTGGGAGcCaAGCAGCTGcCtgccatCCgCaACTcCGCTcttattgtttgtccccatATcTGTA  
TTTGTcGcaCaACTTTGTTGTGATTACGGCGATAAAGCGgcTCaAGTAAATCACAATAatagcagcgtcctaGTCt  
GgCCGActcGgTtCgAAAGAAAGTGTGAATAgagccggggtcaacaatcaacaacaatggattcgcgggaccgga  
ccagcaatgacaaatgtctcttaggcttatgagtgggAAGGGCGAATTcTAACCTATTCTAGA

**apJ2-D-Exd**

GGATCCCTAGGTTAGTAGAATTCGCCCTTatgtgttttggttccaggtccggttgggaaccagcttcaaatgaag  
ttatcacagcgattatattccttaaaacggttcagaaacctccgcccgtgcaatttgaacagctttctgggggtggg  
agttaattttgaggggtttgtgtataaaaggccaAAACAACCCTAATTGAAATTATGCGGTGTGgCTCtGCAGCGA  
cTGCTCGTTTTAGGCTgTGGTATTCCGAAGGGAGTACTaaAGGATTTcAtCGGGCgGgttGCGAACCTTTTTGCGGc  
GGAACcgggTAGCAGACAATATGTCAAAGCTtgccaCtGGGAGGGTGAActCTGTAGCTTCACCCtTcaagcggC  
gtTGcGACTactccAGGGACagCtactTCGAGGcTCGGctGATAAGGGaAAAAGTCATGACAAATAAACGGATA  
TGTGTCCGCAATAGTTTTGCTtATTGCCGCGATAATAATCGACgtGaACAACAATGGtCTTTGTCCtGGTcaTGC  
TCCTGCTGCcTGGGTGCCCaCaTaAAGaACAaTCGCGAGCGCGCGCCCAACgAgAATTACAGGATCGTTTTatggc  
aacgcctggttagCAGTCTCCTGGTAGCACCCGctgccaAAACAACCCTaAGGCGATTATCTCAAGTGCTcGCCc  
ttccaggactatGtTTGCCTccgtgcaccctgCTGTAGATGCTTATCGATTACACGGtGaGCGATGAAcgggTTA  
CTCCGAATTAATAAACGTCATACTCGCTTTTCGTCAActtGtaTTTGAatgTCTCAATgagcgcgctgcccattg  
gcaaggggaaccCATTTCATcgcaGATTTtagaccctggcactgtgatagtggtgtaaacacgctcgcAATTAGTTG  
CctaAaCGAaTgCCCCggcgtagcgtcgtcttccggtcagagtcocggaATGAcATCAagCTCCGAatagTcACT  
TTCTAGTtGgTTGGGAGcCaAGCAGCTGcCtgccatCCgCaACTcCGCTcttattgtttgtccccatATcTGTA  
TTTGTcGcaCaACTTTGTTGcgggTACGGCGATAAAGCGgcTCaAGTAAcggcCAATAatagcagcgtcctaGTCt  
GgCCGActcGgTtCgAAAGAAAGTGTGAATAgagccggggtcaacaatcaacaacaatggattcgcgggaccgga  
ccagcaatgacaaatgtctcttaggcttatgagtgggAAGGGCGAATTcTAACCTATTCTAGA

**eya-CRM WT**

CTCGAggatcacagaatccagcttgctgggtatgctgtagtogaagcccttcgcacGtTCCGcCAATTTggtcgc  
gttgtttcttgggTTAAcCGTTgCCAAGCCTATGAAATggTGcttgcaaccactcgcocgctccggaaaaCaACA  
ACattgAGGCATCGCTGACAAATTGAATTTGTAACTTGTCCgcggaCAACAACAAATCATtGGAGACCCCAgG  
GATGCTGtttccggttgctgatccgtccgttgccataaccatccggattccggagtcagcaggaggAggaggagga  
GGAGGAcgacgcgcccgcacacggaggtggatgccaatgccaatgggacgcTGGAATCCaaTACCCAatgCCCTaT  
CcATGTTACGCTCCTCTGGACGGACTTTCTAACTCGGTcTCagttcgcggctcgcGTTCTgtctcccaaccagc  
CgCCCATcactCCCCAcaaaaacagtggCGAAAGTGATGTGAAATTaTAGActtgcttccgggcggttgGGGGC  
GTGTCaAcgCAGTTGGaAAAAaAaCacacacacgccttaoGCACAATTATTAACACTTATTAATGTTGAGGTT  
TccataTAatATGGCACCCAGGGCTTAAATTAAGTCATCCCgAGTGCCAAACAGCTGcCTCAAGTGccGCACTT  
GAGccgatctggatcccggaacAGGGGGTTGCaaccocgggggttgagtggggttgggcttGGCTTTGTGcTGT  
TTAAGTAGTCATTAAGATcGAGTGtGGATAAGATTTTTTACAGCTGGCtgTCCtgccgttggatccagccagta  
cattcgccaaccctcgcgaacgaaaaaaaaaaaaaagaacaagaaccccgcCTtGCAATTAGCcaacAACCTT  
TGACTccggcccaactcccttcatggtgagccggaatcctgactgtccggaataagCTATTGACAGCTATTGTCTt  
tCTAATTAACAACAATGTTGACCTATTcCAAGatGTCACGGaTCgGTTCAatGaAAAcTTcGTTTTgGtta

AAAAATCaTTGCaAaTTAAtttacactacttttTTcAGaAAATCGgtTgCaTTGTTTGTAAATTAaaaaCTTTtgat  
tgctaggcgaagaacaacccttaaagaagtttgccttgctaaccctttgagtttatctgctgaagaagttgcttg  
ttaaccctttgagttgcttcaacccttttatccttgtaataattaagttgaaggaaagacagtattgtaaatt  
ataaagttgagttgagattgggcgagTCTAGA

#### eya-D Exd CRM

CTCGAggCCGGcagaatccagcttgctgggtatgctgtagtcgacgccttgcacGtTCCGcCAATTTggctgc  
gttgtttcttgggTTAAcCGTTgCCAAGCCTATGAAATggTGcttgcaaccactgccccgtccggaaaaCaACA  
ACattgAGGCATCGCTGACAAATTGAATTTGTAAACTTGTCCgcgggCAACAACAAACCGGTTGGAGACCCCaGG  
GATGCTGtttccggttgcCCGGccgtccgttgccataaccatccggattccggagtcagcaggaggAggaggagga  
GGAGGAcgacgcccggacacggaggtggatgccaatgccaatgggacgcTGGTAATCCaaTACCCAtgCCCTaT  
CcATGTTACGCTCCTCTGGACGGACTTTCTAACTCGGTcTCagttcgccggctcgGTTCTgtcctcccaaccagc  
CgCCCcCCGGctCCCCAcaaaaaacagtggCGAAAGCCGGGTGAAATTaTAGAattgcttccggcggttgGGGGC  
GTGTCaAcgCAGTTGGaAAAAaAaCaacacacacagcttacgCACAAATTATTAACACTTATTAATGTTGAGGTT  
TccataTAtATGGCACCCAGGGCTTAAATTAAAGTCATCCCgAGTGCCAAACAGCTGcCTCAAGTGccGCACTT  
GAGccgatctggatcccggaaacAGGGGGTTGCaaccgggggttgagtggggttgggcggtGGCTTTGTGCcTGT  
TTAAGTAGTCATTAAGATcGAGTGtGGATAAGATTTTTTTCACAGCTGGCtgTCCtgccgttggtaccagccagta  
cattcgccaaccctcgccaaacgaaaaaaaaaaaaacaagaacaagaaccccgcCTtGCAATTAGCcaacAACCTT  
TGACTccggcccaactcccttcatggtgagccggaatcctgactgtccggaataagCTATTGACAGCTATTGTCT  
tCTAATTAACAACAATGTTGACCTATTCcAAgAtGTCACGGaTCgGGTTCAatGaAAAcTTcGTTTTgGtta  
AAAAcCCGGTTGCaAaTTAAtttacactacttttTTcAGaAAATCGgtTgCaTTGTTTGTAAATTAaaaaCTTTCCGG  
tgctaggcgaagaacaacccttaaagaagtttgccttgctaaccctttgagtttatctgctgaagaagttgcttg  
ttaaccctttgagttgcttcaacccttttatccttgtaataattaagttgaaggaaagacagtattgtaaatt  
ataaagttgagttgagattgggcgagTCTAGA

TGAT or ATCA > CCGG

#### eya-D Hox CRM

CTCGAggatcacagaatccagcttgctgggtatgctgtagtcgacgccttgcacGtTCCGcCAATTTggctgc  
gttgtttcttgggTTAAcCGTTgCCAAGCCTATGAAATggTGcttgcaaccactgccccgtccggaaaaCaACA  
ACattgAGGCATCGCTGACAAATTGAATTTGTAAACTTGTCCgcgggCAACAACAAATCATtGGAGACCCCaGG  
GATGCTGtttccggttgcctgatccgtccgttgccataaccatccggattccggagtcagcaggaggAggaggagga  
GGAGGAcgacgcccggacacggaggtggatgccaatgccaatgggacgcTGGCCCGCCaaTACCCAtgCCCTaT  
CcATGTTACGCTCCTCTGGACGGACTTTCTAACTCGGTcTCagttcgccggctcgGTTCTgtcctcccaaccagc  
CgCCCAcactCCCCAcaaaaaacagtggCGAAAGTGATGTGAAcCGGCTAGAattgcttccggcggttgGGGGC  
GTGTCaAcgCAGTTGGaAAAAaAaCaacacacacagcttacgCACACGGCCGGCACACTTCCGGCCGGTTGAGGTT  
TccataTAtATGGCACCCAGGGCTTAAcCGGCAAGTCATCCCgAGTGCCAAACAGCTGcCTCAAGTGccGCACTT  
GAGccgatctggatcccggaaacAGGGGGTTGCaaccgggggttgagtggggttgggcggtGGCTTTGTGCcTGT  
TTAAGTAGTCcGGCAGATcGAGTGtGGATAAGATTTTTTTCACAGCTGGCtgTCCtgccgttggtaccagccagta  
cattcgccaaccctcgccaaacgaaaaaaaaaaaaacaagaacaagaaccccgcCTtGCAcGGGcGcaacAACCTT  
TGACTccggcccaactcccttcatggtgagccggaatcctgactgtccggaataagCTATTGACAGCTATTGTCT  
tCCGGCCGGCAACAACACTTTGACCTATTCcAAgAtGTCACGGaTCgGGTTCAatGaAAAcTTcGTTTTgGtta  
AAAAATCaTTGCaAaCGGCTtttacactacttttTTcAGaAAATCGgtTgCaTTGTTTGTcCCGGCAAAaCTTTtgat  
tgctaggcgaagaacaacccttaaagaagtttgccttgctaaccctttgagtttatctgctgaagaagttgcttg  
ttaaccctttgagttgcttcaacccttttatccttgGCCGCCGGCagttgaaggaaagacagtattgtaaCGG  
CtaaagttgagttgagattgggcgagTCTAGA

Yellow: Hox/Antp/Ap binding sites:

- ATTA > CGGC
- TAAT > GCCG
- ATTAAT > CGGCCG
- TAATTA > GCCGGC
- ATTATTA CGGCCG

#### eya-D Col CRM

CTCGAggatcacagaatccagcttgctgggtatgctgtagtcgacgccttgcacGtTCCGcCAATTTggctgc  
gttgtttcttgggTTAAcCGTTgCCAAGCCTATGAAATggTGcttgcaaccactgccccgtccggaaaaCaACA  
ACattgAGGCATCGCTGACAAATTGAATTTGTAAACTTGTCCgcgggCAACAACAAATCATtGGAGACCCCaGG  
GATGCTGtttccggttgcctgatccgtccgttgccataaccatccggattccggagtcagcaggaggAggaggagga  
GGAGGAcgacgcccggacacggaggtggatgccaatgccaatgggacgcTGGTAATCCaaTACCCAtgCCCTaT

CcATGTTACGCTCCTCTGGACGGACTTTCTAACTCGGTcTCagttcgcggctcgGTTCTgtcctcccaaccagc  
CgCCCAcactCCCCAcaaaaacagtggCGAAAGTGATGTGAAATTaTAGActtgcttccgggcggttgGGGGC  
GTGTCaAcgCAGTTGGaAAAAaAaCacacacacgcttacgCACAAATTATTAACACTTATTAATGTTGAGGTT  
TccataTAatATGGCA**CCCCAGGG**CTTAAATTAAGTCATCCCgAGTGCCAAACAGCTGcCTCAAGTGccGCACCTT  
GAGccgatctggatcccggaacAGGGGGTTGCaacccgggggttgagtggggttgggcggtGGCTTTGTCGcTGT  
TTAAGTAGTCATTAAGATcGAGTGtGGATAAGATTTTTTTCACAGCTGGCtgTCCtgccgttggtaaccagccagta  
cattcgccaaccctcgccaaacgaaaaaaaaaaaaaagaacaagaaccccgCTtGCAATTAGCcaacAACCTT  
TGACTccggcccaactccttcatggtgagccggaatcctgactgtccggaataagCTATTGACAGCTATTGTCt  
tCTAATTAACAACAATGTTGACCTATTCcAAGAtGTCACGGaTCgGGTTCAatGaAAAcTTcGTTTTgGtta  
AAAAATCaTTGCaAaTTAttacactactttTTcAGaAAATCGgtTgCaTTGTTTGTAAATTAaAAaCTTTtgat  
tgctaggcgaagaacaacccttaaagaagttcgccttgctaacccttgagtttatctgctgaagaagttgcttg  
ttaacccttgagttgcgcttaaccctttatccttgtaataattaagttgaaggaaagacagattgtaaaatt  
ataaagttgagttgagattgggcgagTCTAGA

Site 1: **CCCCaGGGA** > **AAAAcTTTC**

Site 2: **CCCCAGGG** > **AAAACTTT**

### **dim-CRM**

**ggatcc**ACTAGTAACGGCCGCCAGTGTGCTGGAattcgccttctgtgccagagcaacgcgaatttaagcattggag  
ttgagttggtggtaaaattgagctcggagcacaacccctttttttgggatgatttatgctgctgccagtgct  
gctctaaaaagcgcgaccaactatctttgatattggaacaatttttggccttaaaatatttgcgtaaacaa  
aattcattagcagagaagtcagcaattaaacatatgtattataaatggaatgatttcttgaattatggttatccg  
aaatataattttgttttttaattttattgaccaggactttttctgaaaaggaaaataaataaaatattttgt  
tttggcgcaattttctttctgcattttttccaatttttagaacacattttctttcacactattttcgaaatcgaa  
tccacatcgataatgtaaaataacaccgaccgtcgcgcgaagtccccatagaagtcgagagggctagtaGAGGAAG  
AAgTCAAcgTCATCGTTAAATTTAATTAGGCATCAAATgacccaacagccgaGCTAAATCAaAAaCcAATGGCCT  
GAAAGtGACCCgAGTGCagggcgaattcaaccgcctggctcaaagggcggtcgcAACACTTTAAAAcACAATTAA  
AAGTCAAAACGTCATtTcTAAAcGaAAGCCAGTGGaCaAaCCcTcCaaGGACcgaAgAGcCgcCaatgaggcgcctg  
agagaaagtgtgatgtgggatggagacatggcgctcacTTTACATAACATTTAACAAAATTATAATGAGacata  
gaatggatgtatatcggtcggggggtgagtccttactcccgtgtcgaatgttaatgggattatgtgaggaatac  
atlttaattttatttgaagtattatcctagcagataaccgcattaggtggtgtccattagaatgaattcaatt  
accgccaagctaagtgatcagaaggaaactataagagaaaataactaagagcaattttttatataattaccgca  
aatgacacatgtaaccaatgtggcctatctctgcgtggagcaacataattacagagcgcagcagatgcgaccgaaa  
tgtaaacagtgtttcttccgaacctaaatctttggaaggcatcaaatacaagacactaGaagggcgaattCTGCA  
GATATCCATCACACTG**GCGGCCGC**

### **dim-D Col-CRM**

**ggatcc**ACTAGTAACGGCCGCCAGTGTGCTGGAattcgccttctgtgccagagcaacgcgaatttaagcattggag  
ttgagttggtggtaaaattgagctcggagcacaacccctttttttgggatgatttatgctgctgccagtgct  
gctctaaaaagcgcgaccaactatctttgatattggaacaatttttggccttaaaatatttgcgtaaacaa  
aattcattagcagagaagtcagcaattaaacatatgtattataaatggaatgatttcttgaattatggttatccg  
aaatataattttgttttttaattttattgaccaggactttttctgaaaaggaaaataaataaaatattttgt  
tttggcgcaattttctttctgcattttttccaatttttagaacacattttctttcacactattttcgaaatcgaa  
**GAACACGAT**ataatgtaaaataacaccgaccgtcg**A**cgcaa**TTC****AAACGCT**aagtcgagaggttagtaGAGGAAG  
AAgTCAAcgTCATCGTTAAATTTAATTAGGCATCAAATgacccaacagccgaGCTAAATCAaAAaCcAATGGCCT  
GAAAgtGACCCgAGTGCagggcgaattcaaccgcctggctcaaagggcggtcgcAACACTTTAAAAcACAATTAA  
AAGTCAAAACGTCATtTcTAAAcGaAAGCCAGTGGaCaAaCC**AGAACCTTC**CcgaAgAGcCgcCaatgaggcgcctg  
agagaaagtgtgatgtgggatggagacatggcgctcacTTTACATAACATTTAACAAAATTATAATGAGacata  
gaatggatgtatatcggtcggggggtgagtccttactcccgtgtcgaatgttaatgggattatgtgaggaatac  
atlttaattttatttgaagtattatcctagcagataaccgcattaggtggtgtccattagaatgaattcaatt  
accgccaag**AGCCTGTTT**tcagaaggaaactataagagaaaataactaagagcaattttttatataattaccgca  
aatgacacatgtaaccaatgtggcctatct**AGTATGTTT**gcaacataattacagagcgcagcagatgcgaccgaaa  
tgtaaacagtgtttcttccgaacctaaatctttggaaggcatcaaatacaagacactaGaagggcgaattCTGCA  
GATATCCATCACACTG**GCGGCCGC**

Conversion Pattern

A>C; T>G; C>A; G>T

tccacatcg: **GAACACGAT**

tccccatag: **GAAAACGCT** converting that site would create the following

binding site with the upstream region ccgcaagGA. Conversion to **A**cgcaa**TTC**;

after that conversion no possible col sites detectable

CtCcaaGGA: **AGAACCTTC**

Ctaagtgga: AGCCTGTTC  
Ctgcgtgga: AGTATGTTC

**dim-D Hox-CRM**

**ggatcc**ACTAGTAACGGCCGCCAGTGTGCTGGAaattcgcccttgtgccagagcaacgcgaatttaagcattggag  
ttgagttggtggtgtaaattgagctcggagcacaacccctttttttgggatgatttatgctgctgccagtgc  
gctctaaaaagcgccgaccaactatctttgatattggttaacaatttttggccttaaaatatttgcgtaaaca  
aattc**cggc**gcagagaagtgcagca**cggc**aacatatgt**cggc**taaatggaatgatttcttga**cggc**tggttatccg  
aaata**gccg**ttttgttttt**gccg**ttattgaccaggactttttctgaaaaggaaaataaataaataaattttgt  
tttggcgcaatttctttctgcatttatttccaatttttagaacacatttctttcacactatttcgaaatcgaa  
tccacatcgag**gccg**gtaaaataacaccgaccgtcgccgcaagtcoccatagaagtcgagaggctagtaGAGGAAG  
AAgTCAAcgTCATCGTTAAATT**gccggc**GGCATCAAATgacccaacagccgaGCTAAATCAaAAaCcAATGGCCT  
GAAAgTGAACCGAGTGCaggcgaaattcaaccgcctggctcaaagggcggtcgcAACACTTTAAAAcACA**cggc**A  
AAGTCAAAACGTCAATcTAAAcGaAAGCCAGTGGaCAaCCcTcCaaGGACcGaAgAGCCgcCaatgaGGCGCCgt  
agagAAAGtgctgatgtgggatggagacatggcgctcacTTTACATAACATTTAAcAAA**cggc****gccg**GAGacata  
gaatggatgtatatcggtcggggggtgagtccttactcccggtgcgaATGT**gccg**GgG**cggc**gtgtaggaatac  
att**gccg**atttatttgaagt**cggc**ctctagcgagataaccgc**cggc**ggtggtgtcc**cggc**gaatgaattca**cggc**  
**cggc**cccaagctaagtggatcagaaggaaactataagagaaaataactaagagcaattttttatag**gccggc**ccgca  
aatgcacatgtaaccaatgtggcctatctctgcgtggagcaacag**gccggc**cagagcgagcagatgcgaccgaaa  
tgtaaacagtgtttcttccgaacctaaatctttggaaggcatcaaatcaagacactagaagggcgaattCTGCA  
GATATCCATCACACTG**GCGGCCGC**

Conversion Pattern  
A>C; T>G; C>A; G>T  
TAAT= **gccg**  
ATTA= **cggc**

**dim-D Exd-CRM**

**ggatcc**ACTAGTAACGGCCGCCAGTGTGCTGGAaattcgcccttgtgccagagcaacgcgaatttaagcattggag  
ttgagttggtggtgtaaattgagctcggagcacaacccctttttttggga**ccgg**ttatgctgctgccagtgc  
gctctaaaaagcgccgaccaactatctt**ccgg**atttgtaacaatttttggccttaaaatatttgcgtaaaca  
aattcattagcagagaagtgcagcaattaaacatatgtattataaatggaa**ccgg**ttcttgaattatggttatccg  
aatataattttgttttttaatttattgaccaggactttttctgaaaaggaaaataaataaataaattttgt  
tttggcgcaatttctttctgcatttatttccaatttttagaacacatttctttcacactatttcgaaatcgaa  
tccacatcgataatgtaaaataacaccgaccgtcgccgcaagtcoccatagaagtcgagaggctagtaGAGGAAG  
AAgTCAAcgTCATCGTTAAATTTAATTAGGC**ccgg**AATgacccaacagccgaGCTAA**ccgg**AAaCcAATGGCCT  
GAAAgTGAACCGAGTGCaggcgaaattcaaccgcctggctcaaagggcggtcgcAACACTTTAAAAcACAATTAA  
AAGTCAAAACGTCAATcTAAAcGaAAGCCAGTGGaCAaCCcTcCaaGGACcgaAgAGcCgcCaatgagggcgccgt  
agagaaagtgc**ccgg**gtgggatggagacatggcgctcacTTTACATAACATTTAAcAAAAATTATAATGAGacata  
gaatggatgtatatcggtcggggggtgagtccttactcccggtgcgaatgtaatgggattatgtgaggaatac  
attttaatatttatttgaagtattatcttagcgagataaccgcattaggtggtgtccattagaatgaattcaatt  
accgccaagctaagtgg**ccgg**gaaggaaactataagagaaaataactaagagcaattttttatataattaccgca  
aatgcacatgtaaccaatgtggcctatctctgcgtggagcaacataattacagagcgagcagatgcgaccgaaa  
tgtaaacagtgtttcttccgaacctaaatctttggaaggc**ccgga****ccgg**aagacactaGaagggcgaattCTGCA  
GATATCC**ccgg**CACTG**GCGGCCGC**

**Nplp1-CRM WT**

**ggatcc**actagtaacggccgcccagtgctggaattcgcccttctgccccttt**TGCAGCAC**c**CACTT**c**CAAACCGA**  
**TTtAAACCgTAACGGAAACACGGACGCGA**agc**TTTG**ccg**TTtGCCAGCTGCCGTA**acac**TAaCGTTAGCCgCaAA**  
**GTCGTCTGCTCGACTGCTTT**ct**CTTGCCAGGACCCTCGACTTT**a**TATA**c**CCGAGCGGCACCCCGGATAAGCTCa**  
**CTCGGGGAGCGAAACCGGAGCGCCGTCAACTGTTGCTCTTC**t**AtAG**c**CTCTCTGTTGCGTGTGCAGTGTCTGT**  
**TTCGTGGG**at**GCT**at**TGTAGGTAATGACGTCATGG**c**GGCTGCAGGACAGAGCTCTGTTgCTT**c**TtGG**t**AGCTCT**  
**GTGTATTcAGGCCAACC**a**GCAGCACAGTG**cacagctaca**AAGCTTTTTCGAT**a**TtaAAT**tggtattcgcaggttac  
attattgattcattttgaaaatataatagaatgtttgcaggccaaaaaaattaaaatgaatccaagtccaaaa  
taaaaaaattaatagaaaacccttcttagctacgatttttccgggttccgggtataattgaaactcgaaccg  
ttttcttatcatttttctttcaac**TtTGC**a**AGTT**caa**TCCACTG**tg**CgCTgG**t**GCTT**t**GGGACCAATCTAAGAG**  
**TTTT**tg**GTTTCTCTTAATT**c**GAAC**t**TGAGCTgT**a**GCCATATGTtGGCGCTC**t**CAGCGGgGcCacTGTCG**  
**AGAACTTAACACTT**a**AATA**a**AAA**c**C**ttgaaatca**AACATATGCTTCAA**at**ATT**c**TTTATTGGA**Aatattaaaatc  
acac**TTgAAGT**t**AAT**c**AgAgTA**a**TTAAAACAC**aaa**TAGG**c**TTgTTGAAAT**a**TTTTTCTA**c**CT**ttt**gtTtG**t**G**a  
**TtACT**a**TGTAT**gattac**ATTTAATCTGATTATCG**g**ATAGCAATgGGCTGGAAATACATTAT**c**AATCACATTTAC**  
**TTTT**c**GaTTATTCA**a**AATAA**c**ATT**ttt**AT**t**AT**tt**TC**Aatgattacattcgggttttttaacctcgaatcttttco



cgtataaacCAAATTAAaagcattggaattcaatgaagtacaaaagaactcccgattagaatggcggttgcaagtga  
cctgtctgtaagaattccgaaaatataaaaataacccaaaagccggaaagtaatgccAAcAGAtAgATTGCTgCAC  
ccCtCccGCaGAAGcTAagTTTATGCAATTTcCGAATaCcATATTATGAAGCGTAAAtgttataaaCCAGATCCc  
CGTTTATaCCCaaaCCCTgAGTGCgGCaAGaGCAaTGCACAAAaTGCAGGGGCGGTcACAAtCATaTGCCTACG  
TCAGTAAAGCAAAtCGCTGTGGGGGTTTCcCCGCGTCACtCCtAAAAGaAGGATATATgGcgGATGGcagatgaA  
GCGgCGGATGTAGCAGATTGCACGccgggtacagacagctggcagggAAACcTGtCAGCGCActgcaacataggaG  
GTTGGaGCCaGCGGTACTGtCGGCtTTTGcTtCaAcCAATccatgcaagggcgaaattCTGCAGATATCCATCACA  
CTGGCGGCCGC

#### Nplp1-D Col CRM

ggatccactagtaacggccgcccagtggtgctggaattgcaccttctgacctttTGCAGCACcCACTGaACCCAATA  
TTtAAACATGCCATTAAACACTGACGCGAaTcTTTGccgTTtGCCAGCTGCCGTAacacTAaCGTTAGCCgCaAA  
GTCGTCTGCTCGACTGCTTTctCTTGGCCAGGACCCTCGACTTTaTATAcACGAGCTTCCAAAATTCtTAAGCTCa  
AGATATTTcGCGAAACCGGAGCGCCGTCAACTGTTGCTCTTCtAtAGcCTCTCTGTTGCGTGTGCAGTGTCTCTGT  
TTCGTGGGatGCTatTGTAGGTAATGACGTCATGGcGGCTGCAGGACAGAGCTCTGTTgCTTcTtGGtaAGCTCT  
GTGTATTcAGGCCAACCAGCAGCACAGTGCacagctacaAAGCTTTTCGATaTtAAATgggtattcgcaggttac  
attattgattcattttgaaaatataatagaatgtttgcaggccaaaaaaattaaaatgaatccaagtccaaaa  
taaaaaaattaatagaaaacccttcccttagctacgatttttccgggttccggtataatttgaattactcgaaaccg  
ttttcttatcatttttctttcaacTtTGCaAGTTcaaGAACAGTgtCgCTgGttGCTTtGGGACCAATCTAAGAG  
TTTTtgTTTTCTCTTAATTcGAACtTGAGCTgtacGCCATATGTtGGCGCTCtCAGCGGgGcCacTGTCGgTCGC  
AGAActTAACACTTAAATAaaaaCcttgaatcaAACATATGCTTCAAatATTcTTTATTGGaAtattttaaatac  
acacTTgAAGTtAATcAgAgTAaTTAAAACACaaaTAGGcTTtgTTGAAATaTTTTTCTAaCTtttgTgTTGta  
tTtACTaTGTATgattacATTTAATCTGATTATCGgATAGCAATgGGCTGAAATACATTATcAATFCATTTAC  
TTTTcGatTATTCAaATAAacATTtttATtATttCAAttgattacattcggtttttaacctogaatcttttcat  
cgtataaacCAAATTAAaagcattggaattcaatgaagtacaaaagaactcccgattagaatggcggttgcaagtga  
cctgtctgtaagaattccgaaaatataaaaataacccaaaagccggaaagtaatgccAAcAGAtAgATTGCTgCAC  
ccCtCccGCaGAAGcTAagTTTATGCAATTTcCGAATaCcATATTATGAAGCGTAAAtgttataaaCCAGATCCc  
CGTTTATaCCCaaaCCCTgAGTGCgGCaAGaGCAaTGCACAAAaTGCAGGGGCGGTcACAAtCATaTGCCTACG  
TCAGTAAAGCAAAtCGCTGTGGGGGTTTCcCCGCGTCACgAAgCACCTaATTCtATATgGcgGATGGcagatgaA  
GCGgCGGATGTAGCAGATTGCACGccgggtacagacagctggcagggAAACcTGtCAGCGCActgcaacataggaG  
GTTGGaGCCaGCGGTACTGtCGGCtTTTGcTtCaAcCAATccatgcaagggcgaaattCTGCAGATATCCATCACA  
CTGGCGGCCGC

TcCAAACCG > GaACCCAAT  
CGTAACGGA > ATGCCATTC  
CACCCCGGA > ACAAAATTC

CTCGCGGGA > AGATATTTc

TCCACTGtg > GAACAGTgt

tCCtAAAAG > gAAgCCCCT

Special Cases of new possible Col site creation after basepair conversion:  
ATGCCATTAAaacacTTC: Converting the first Col site would place a C in the  
end. This creates a new Col binding site with the downstream base pairs. So  
the last GGA basepairs were changed to TTC to take out the newly created  
possible Col binding site.

After conversion the sequence looks like following: TTCcGCGAag: This  
sequence resembles a reverse Col site again. So a final conversion of the  
Initial TTC into a GA and the final G into a T is applied.

acgagcTTCcAAAATTC: same strategy applied here

gAAgCACCTaaTTC: same strategy applied here

#### Nplp1-D Hox CRM

ggatccactagtaacggccgcccagtggtgctggaattgcaccttctgacctttTGCAGCACcCACTTcCAAACCGA  
TTtAAACCGTAACGGAAACACGGACGCGAagcTTTGccgTTtGCCAGCTGCCGTAacacTAaCGTTAGCCgCaAA  
GTCGTCTGCTCGACTGCTTTctCTTGGCCAGGACCCTCGACTTTaTATAcCCGAGCGGCACCCCGGATAAGCTCa  
CTCGCGGGAGCGAAACCGGAGCGCCGTCAACTGTTGCTCTTCtAtAGcCTCTCTGTTGCGTGTGCAGTGTCTCTGT  
TTCGTGGGatGCTatTGTAGGCCCCGACGTCATGGcGGCTGCAGGACAGAGCTCTGTTgCTTcTtGGtaAGCTCT

GTGTATTTCAGGCCAACCaGCAGCACAGTgcacagctacaAAGCTTTTCGATcggcAATtggtattcgcaggttac  
cggccttgattcattttgaaaatagccgagaatgtttgcaggccaaaaaaacggcAaatgaatccaagtccaaaa  
taaaaaacggccgagaaaacccttccttagctacgatttttcgggtttcggtagccggttgacggcctcgaaaccg  
ttttccttatcatttttctttcaacTtTGCaAGTTcaaTCCACTGtgCgCTgGttGCTTtGGGACCAATCTAAGAG  
TTTTtgTTTTCTCT**GCCGT**TcGAACtTGAGCTgTacGCCATATGTtGGCGCTCtCAGCGGgGcCacTGTCCgTCGC  
AGAActTAACACTTaAATAaAAAAcCcttgaatcaAACATATGCTTCAAatATTcTTTATTGGaAtatttaaaatc  
acacTTgAAGTgcccgcAgAggcccggcAAACACaaaTAGGcTTtgTTGAAATaTTTTCTAAcTtttgTgTtGta  
tTtACTaTGTATgcccgcATT**GCCG**CTG**CGGC**TCGgATAGCAATgGGCTGGAAATAC**CGGC**TcAATCACATTTAC  
TTTTcGggcTTCAaAATAAacATTtttcggcTttTCAttgcccgcattcgggttttaacctcgaatcctttcat  
cgtataaacCAA**CGGC**Aaagcattggaattcaatgaagtacaaaagaactcccggcgaatggcgttgagtgac  
cctgtctgtaagaattccgaaaatataaaaataacccaaaagccggaaagggccAAcAGAtAgATTGCTgCAC  
ccCtCccGCaGAAGcTAagTTTATGCAATTTcCGAATaCcAT**CGGC**TGAAGCGTAAAatgttaaaaCCAGATCCc  
CGGTTATaCCaAaCCctgAGTGCgGCaAGaGCAaTGCACAAAaTGCAGGGGGCGGTCAcAaTATaTGCCCTACG  
TCAGTaaAGCAAAtCGCTGTGGGGGTTTcCCGCGTCAcTcTAAAAGaAGGATATATgGcgGATGGcagatgaA  
GCGgCGGATGTAGCAGATTGCACGccgggtacagacagctggcagggAAACcTgTcAGCGCActgcaacataggaG  
GTTGGaGCCaGCGGTACTGtCGGCTTTTgCtTcCaAcCAAtccatgcaagggcgaattCTGCAGATATCCATCACA  
CTG**CGGCCCCG**

Hox binding sites: TAAT, ATTA convert into  
ATTA > cggc, TAAT > gccg

### **Nplp1-D E-box CRM**

**ggatcc**actagtaacggccgcccagtggtggaattcgcctttTGcagCACcCACTTcCAAACCGA  
TTAAACCGTAACGGAAACACGGACGCGAagcTTTGccgTtTGC**ACTAGT**CCGTAacacTaaCGTTAGCCgCaAA  
GTCGTCTGCTCGACTGCTTTctCTTGGCCAGGACCCTCGACTTTaTATAcCCGAGCGGCACCCCGGATAAGCTCa  
CTCGCGGGAGCGAAACCGGAGCGCCGT**ACCAGT**TTGCTCTTcTAtAGcCTCTCTGTTGCGTGTGCAGTGTCTCTGT  
TTCGTGGGatGCTatTGTAGGTAATGACGTATGGcGGCTGCAGGACAGAGCTCTGTgCTTcTtGGtaAGCTCT  
GTGTATTTCAGGCCAACCaGCAGCACAGTgcacagctacaAAGCTTTTCGATaTtaAATtggtattcgcaggttac  
attattgattcattttgaaaatataatagaatgtttgcaggccaaaaaaattaaaatgaatccaagtccaaaa  
taaaaaaattaatagaaaacccttccttagctacgatttttcgggtttcgggtataatgtaactcgaaccg  
ttttccttatcatttttctttcaacTtTGCaAGTTcaaTCCACTGtgCgCTgGttGCTTtGGGACCAATCTAAGAG  
TTTTtgTTTTCTCTTAATTcGAACtTGAGCTgTacGC**ACGCGT**TtGGCGCTCtCAGCGGgGcCacTGTCCgTCGC  
AGAActTAACACTTaAATAaAAAAcCcttgaatcaAA**ACGCGT**CTTCAAatATTcTTTATTGGaAtatttaaaatc  
acacTTgAAGTtAATcAgAgTAaTTAAAACACaaaTAGGcTTtgTTGAAATaTTTTCTAAcTtttgTgTtGta  
tTtACTaTGTATgattacATTTAATCTGATTATCGgATAGCAATgGGCTGGAAATACATTATcAATCACATTTAC  
TTTTcGaTTATTCAaAATAAacATTtttATtATtTTCAttgattacattcgggttttaacctcgaatcctttcat  
cgtataaacCAAATTAAaagcattggaattcaatgaagtacaaaagaactcccgattagaatgctgtgagtgac  
ctgtctgtaagaattccgaaaatataaaaataacccaaaagccggaaagtaatgccAAcAGAtAgATTGCTgCACc  
cCtCccGCaGAAGcTAagTTTATGCAATTTcCGAATaCcATATTATGAAGCGTAAAatgttaaaaCCAGATCCcC  
GGTTATaCCaAaCCctgAGTGCgGCaAGaGCAaTGCACAAAaTGCAGGGGGCGGTCAcAa**ACgCGT**CCTACGT  
CAGTaaAGCAAAtCGCTGTGGGGGTTTcCCGCGTCAcTcTAAAAGaAGGATATATgGcgGATGGcagatgaAG  
CGgCGGATGTAGCAGATTGCACGccgggtacagacagctggcagggAAACcTgTcAGCGCActgcaacataggaGG  
TTGGaGCCaGCGGTACTGtCGGCTTTTgCtTcCaAcCAATCCATGCaagggcgaattCTGCAGATATCCATCACAC  
TG**CGGCCCCG**

possible E-boxes, CANNTG; base exchange A > C ; T > G ; C > A ; G > T  
cATATG > aCGCGT  
CAcGTG > ACaTGT

CAtATG > ACgCGT  
CATATG > ACGCGT  
CAGCTG > ACTAGT  
CAACTG > ACCAGT  
CaGTTg > AcTGGt  
CaATTG > AcCGGT
