# Supplementary material for: Neuronal cell fate specification by the molecular convergence of different spatio-temporal cues on a common initiator terminal selector gene
Source: PubMed Central journal article supplement (PMC5411104; doi:10.1371/journal.pgen.1006729), 2017-04-17
Supplement: pgen.1006729.s011.pdf [file pgen.1006729.s011.pdf]

## SUPPLEMENTAL REFERENCES

1. Gebelein B, McKay DJ, Mann RS. Direct integration of Hox and segmentation gene inputs during *Drosophila* development. *Nature*. 2004;431(7009):653-9. Epub 2004/10/08. doi: 10.1038/nature02946. PubMed PMID: 15470419.
2. Ryoo HD, Marty T, Casares F, Affolter M, Mann RS. Regulation of Hox target genes by a DNA bound Homothorax/Hox/Extradenticle complex. *Development (Cambridge, England)*. 1999;126(22):5137-48. Epub 1999/10/26. PubMed PMID: 10529430.
3. Kambadur R, Koizumi K, Stivers C, Nagle J, Poole SJ, Odenwald WF. Regulation of POU genes by castor and hunchback establishes layered compartments in the *Drosophila* CNS. *Genes & development*. 1998;12(2):246-60. PubMed PMID: 9436984.
4. Merabet S, Mann RS. To Be Specific or Not: The Critical Relationship Between Hox And TALE Proteins. *Trends Genet*. 2016;32(6):334-47. Epub 2016/04/14. doi: 10.1016/j.tig.2016.03.004. PubMed PMID: 27066866; PubMed Central PMCID: PMC4875764.
5. Kuzin A, Kundu M, Brody T, Odenwald WF. Functional analysis of conserved sequences within a temporally restricted neural precursor cell enhancer. *Mechanisms of development*. 2011;128(3-4):165-77. Epub 2011/02/15. doi: 10.1016/j.mod.2011.02.001. PubMed PMID: 21315151; PubMed Central PMCID: PMC3095431.
6. Hagman J, Belanger C, Travis A, Turck CW, Grosschedl R. Cloning and functional characterization of early B-cell factor, a regulator of lymphocyte-specific gene expression. *Genes & development*. 1993;7(5):760-73. Epub 1993/05/01. PubMed PMID: 8491377.
7. Kitamoto T, Salvaterra PM. A POU homeo domain protein related to dPOU-19/pdm-1 binds to the regulatory DNA necessary for vital expression of the *Drosophila* choline acetyltransferase gene. *J Neurosci*. 1995;15(5 Pt 1):3509-18. Epub 1995/05/01. PubMed PMID: 7751926.
8. Verrijzer CP, Alkema MJ, van Weperen WW, Van Leeuwen HC, Strating MJ, van der Vliet PC. The DNA binding specificity of the bipartite POU domain and its subdomains. *The EMBO journal*. 1992;11(13):4993-5003. Epub 1992/12/01. PubMed PMID: 1361172; PubMed Central PMCID: PMC556977.
9. Nibu Y, Senger K, Levine M. CtBP-independent repression in the *Drosophila* embryo. *Molecular and cellular biology*. 2003;23(11):3990-9. Epub 2003/05/16. PubMed PMID: 12748300; PubMed Central PMCID: PMC155210.
10. Pankratz MJ, Hoch M, Seifert E, Jackle H. Kruppel requirement for knirps enhancement reflects overlapping gap gene activities in the *Drosophila* embryo. *Nature*. 1989;341(6240):337-40. Epub 1989/09/28. doi: 10.1038/341337a0. PubMed PMID: 2797151.
11. Matyash A, Chung HR, Jackle H. Genome-wide mapping of in vivo targets of the *Drosophila* transcription factor Kruppel. *The Journal of biological chemistry*. 2004;279(29):30689-96. Epub 2004/05/08. doi: 10.1074/jbc.M403345200. PubMed PMID: 15131112.
12. Schroeder MD, Pearce M, Fak J, Fan H, Unnerstall U, Emberly E, et al. Transcriptional control in the segmentation gene network of *Drosophila*. *PLoS biology*. 2004;2(9):E271. Epub 2004/09/02. doi: 10.1371/journal.pbio.0020271. PubMed PMID: 15340490; PubMed Central PMCID: PMC514885.
